# Supplementary material for: The origin and early spread of SARS-CoV-2 in Europe
Source: PubMed Central journal article supplement — Proc Natl Acad Sci U S A. 2021 Feb 10;118(9):e2012008118. doi: 10.1073/pnas.2012008118 (PMC7936359; doi:10.1073/pnas.2012008118), 2021-02-10
Supplement: pnas.2012008118.sapp.pdf [file pnas.2012008118.sapp.pdf]

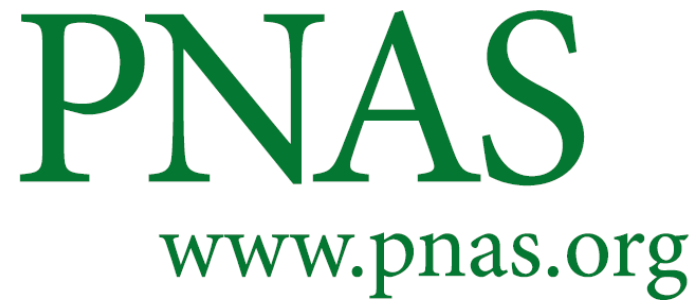

**Supplementary Information for**  
The origin and early spread of SARS-CoV-2 in Europe.

Sarah A. Nadeau<sup>1,2</sup>, Timothy G. Vaughan<sup>1,2</sup>, Jérémie Scire<sup>1,2</sup>, Jana S. Huisman<sup>1,2,3</sup>, Tanja Stadler<sup>1,2\*</sup>

\* Corresponding Author  
Tanja Stadler  
Email: [tanja.stadler@bsse.ethz.ch](mailto:tanja.stadler@bsse.ethz.ch)

**This PDF file includes:**

Figures S1 to S9  
Tables S1 to S6

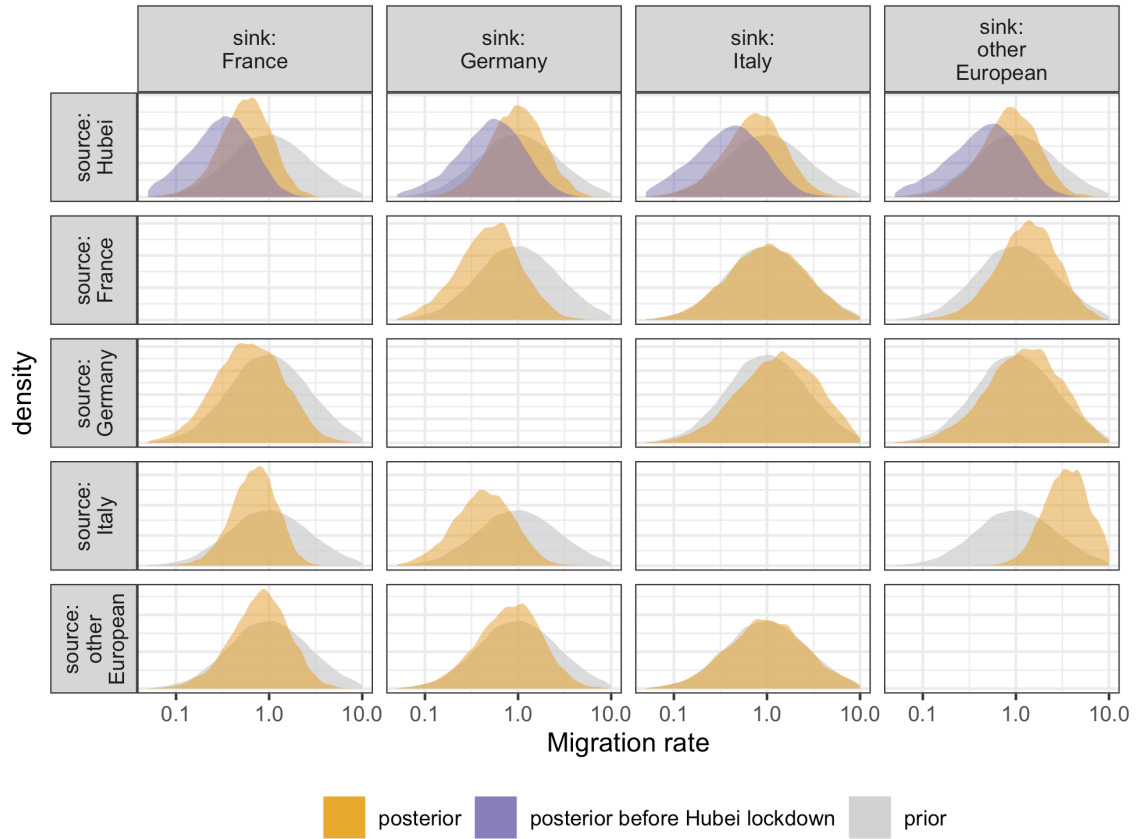

**Fig. S1.** Posterior distributions for migration rates (yellow for rates out of Hubei before 23 Jan. 2020 and rates between non-Hubei demes, purple for rates out of Hubei after 23 Jan. 2020) compared to the prior distribution (grey).

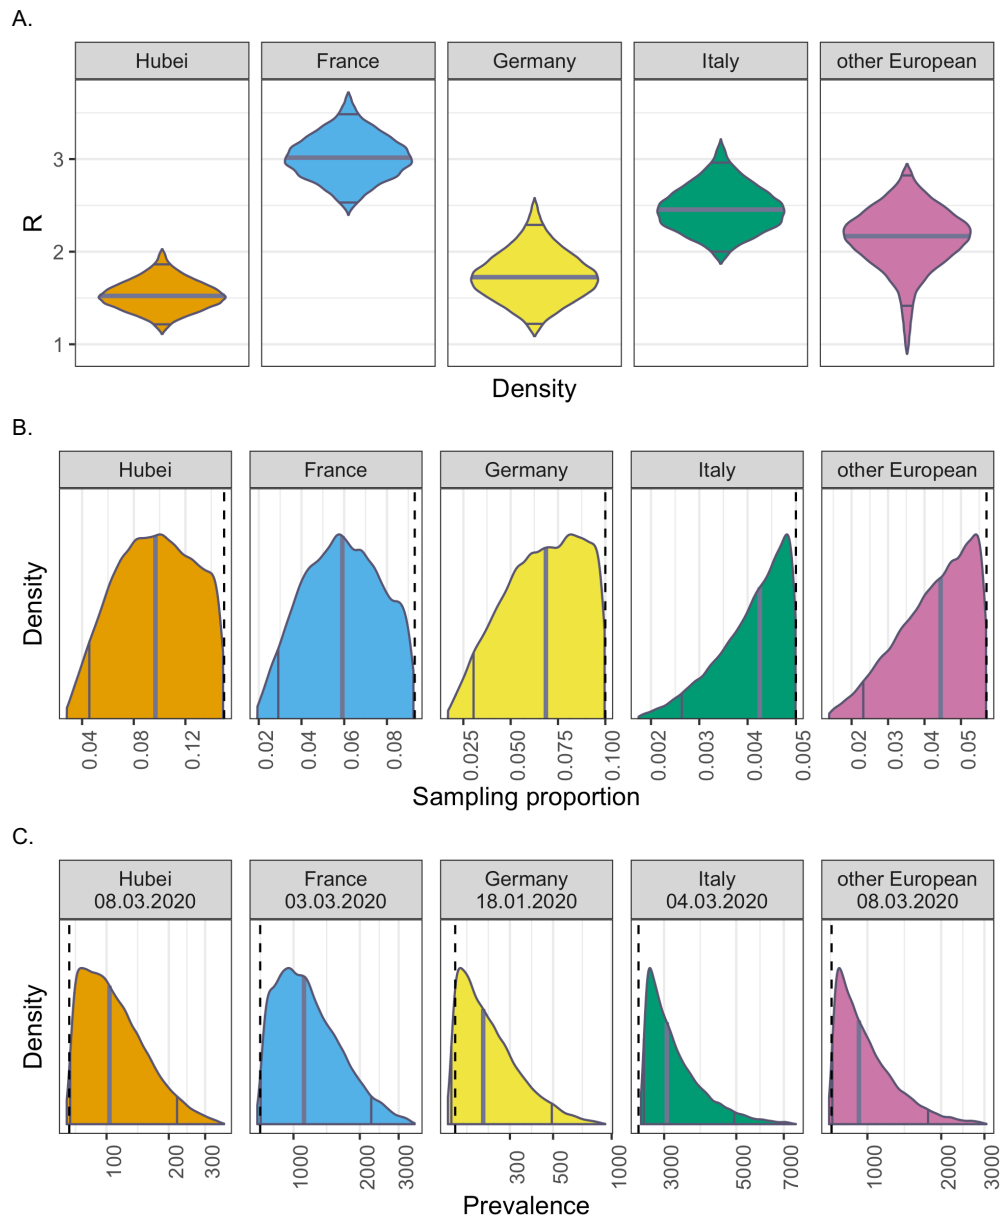

**Fig. S2.** Posterior distributions for inferred parameters in the main analysis. A) reproductive number, B) sampling proportion, and C) the number of no-longer infectious cases on the date of the last analyzed sequence (dates in facet titles) for each region. The dashed lines in B) show the upper bound of the uniform sampling prior for each region and in C) the number of confirmed cases on the date of the last analyzed sample. The solid grey lines show the 95% highest posterior density interval and the median for each posterior.

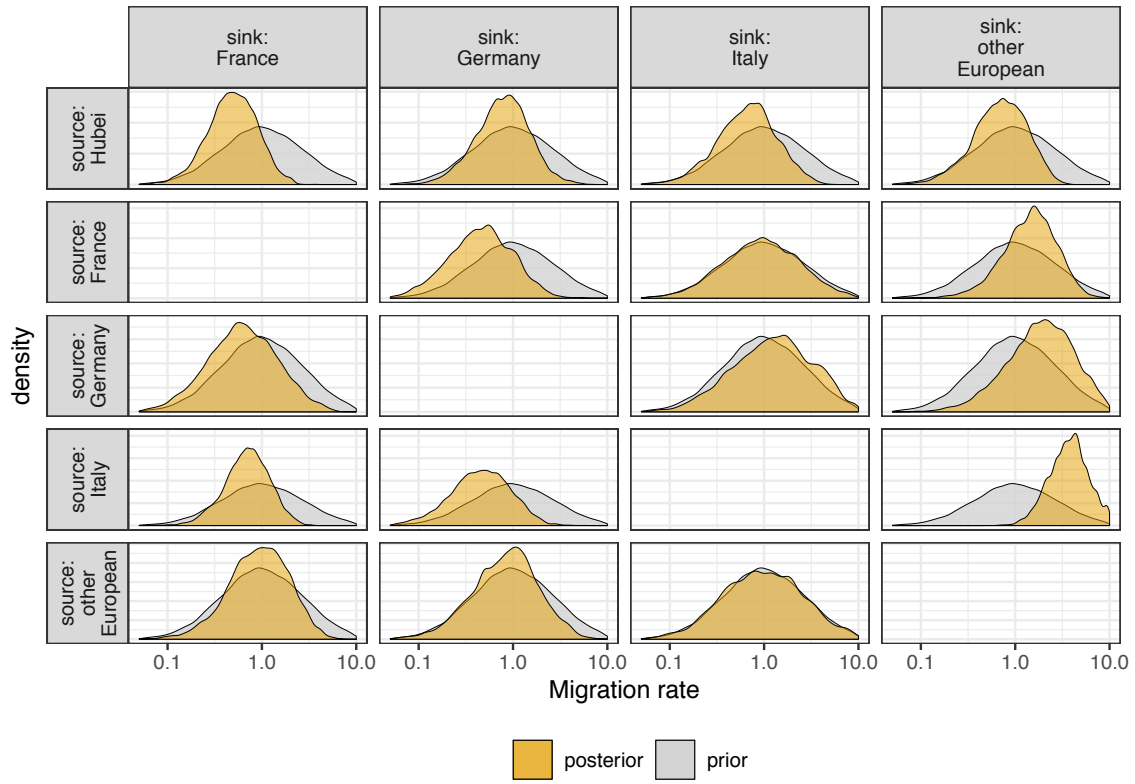

**Fig. S3.** Posterior distributions (yellow) for migration rates compared to the prior distribution (grey) in the analysis with down-sampling based on death data from 28 Mar. 2020.

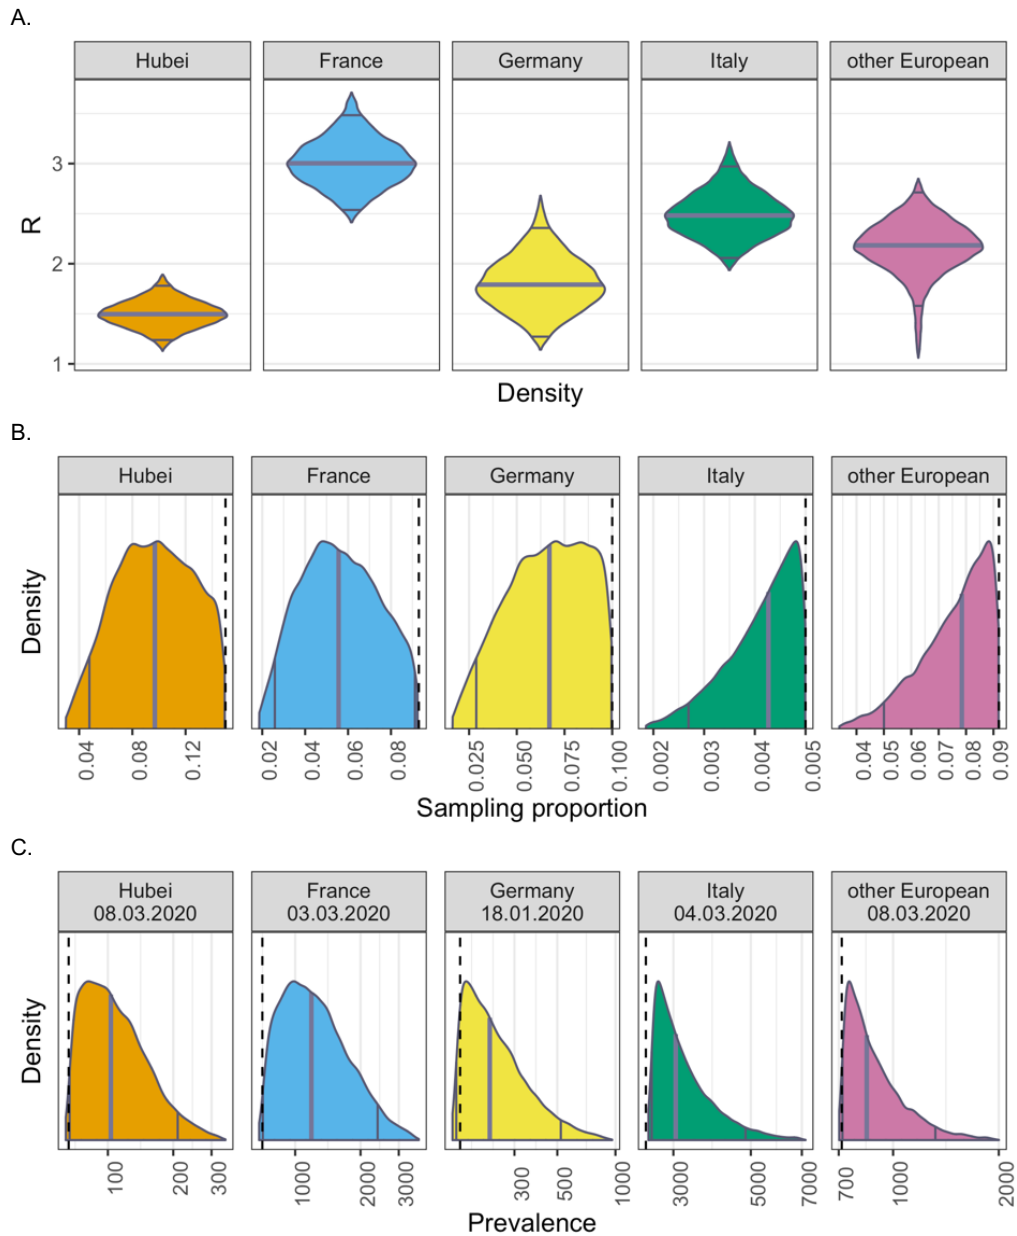

**Fig. S4.** Posterior distributions for inferred parameters in the analysis with down-sampling based on death data from 28 Mar. 2020. A) reproductive number, B) sampling proportion, and C) the number of no-longer infectious cases on the date of the last analyzed sequence (dates in facet titles) for each region. The dashed lines in B) show the upper bound of the uniform sampling proportion prior for each region and in C) the number of confirmed cases on the date of the last analyzed sample. The solid grey lines show the 95% highest posterior density interval and the median for each posterior.

## Maximum clade credibility tree

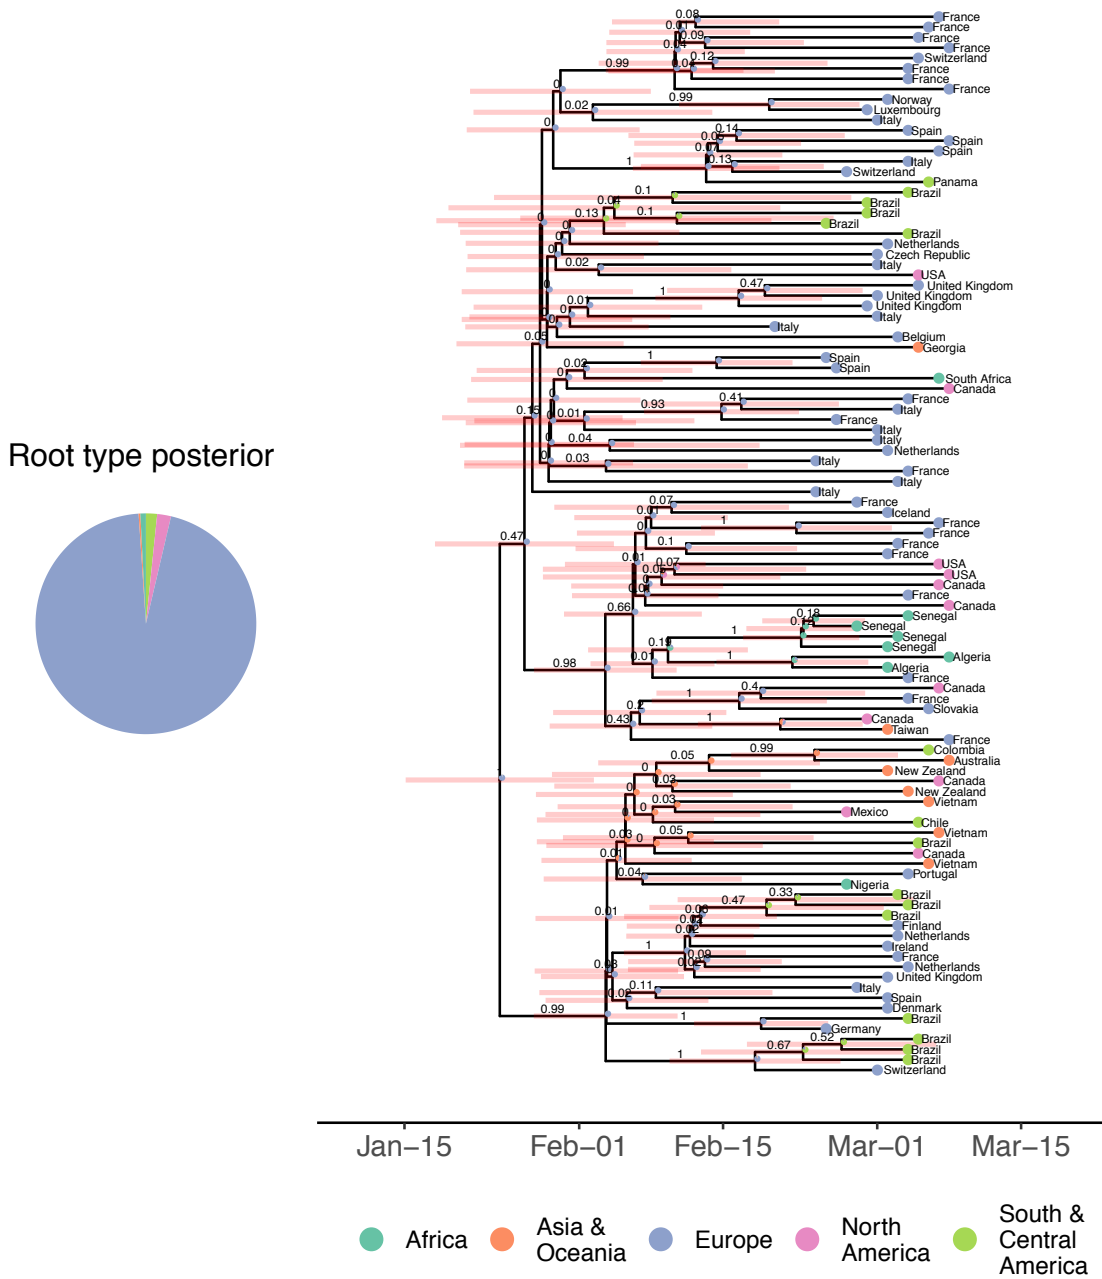

**Fig. S5.** Ancestral location inference results for the sensitivity analysis with sequences from the A2a clade from all global regions. The pie chart on the left shows the posterior probabilities for the location of the most recent common ancestor of the analyzed sequences. The tree on the right is the maximum clade credibility tree. The values above the branches are posterior clade probabilities. The pie charts at nodes show the posterior probability of the node being in each deme. The deme for each tip is the region in which the sequence was collected (irrespective of travel history). Tips are annotated with the country in which the sequence was collected.

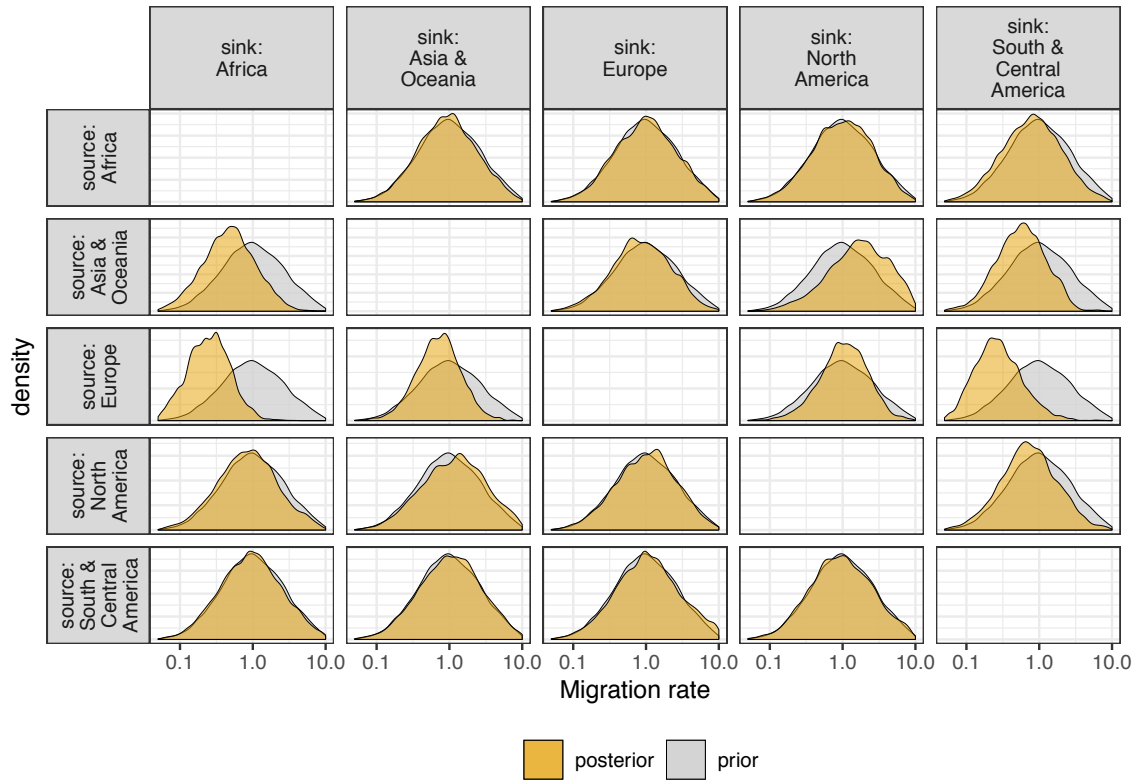

**Fig. S6.** Posterior distributions (yellow) for migration rates compared to the prior distribution (grey) for the analysis with sequences from the A2a clade from all global regions.

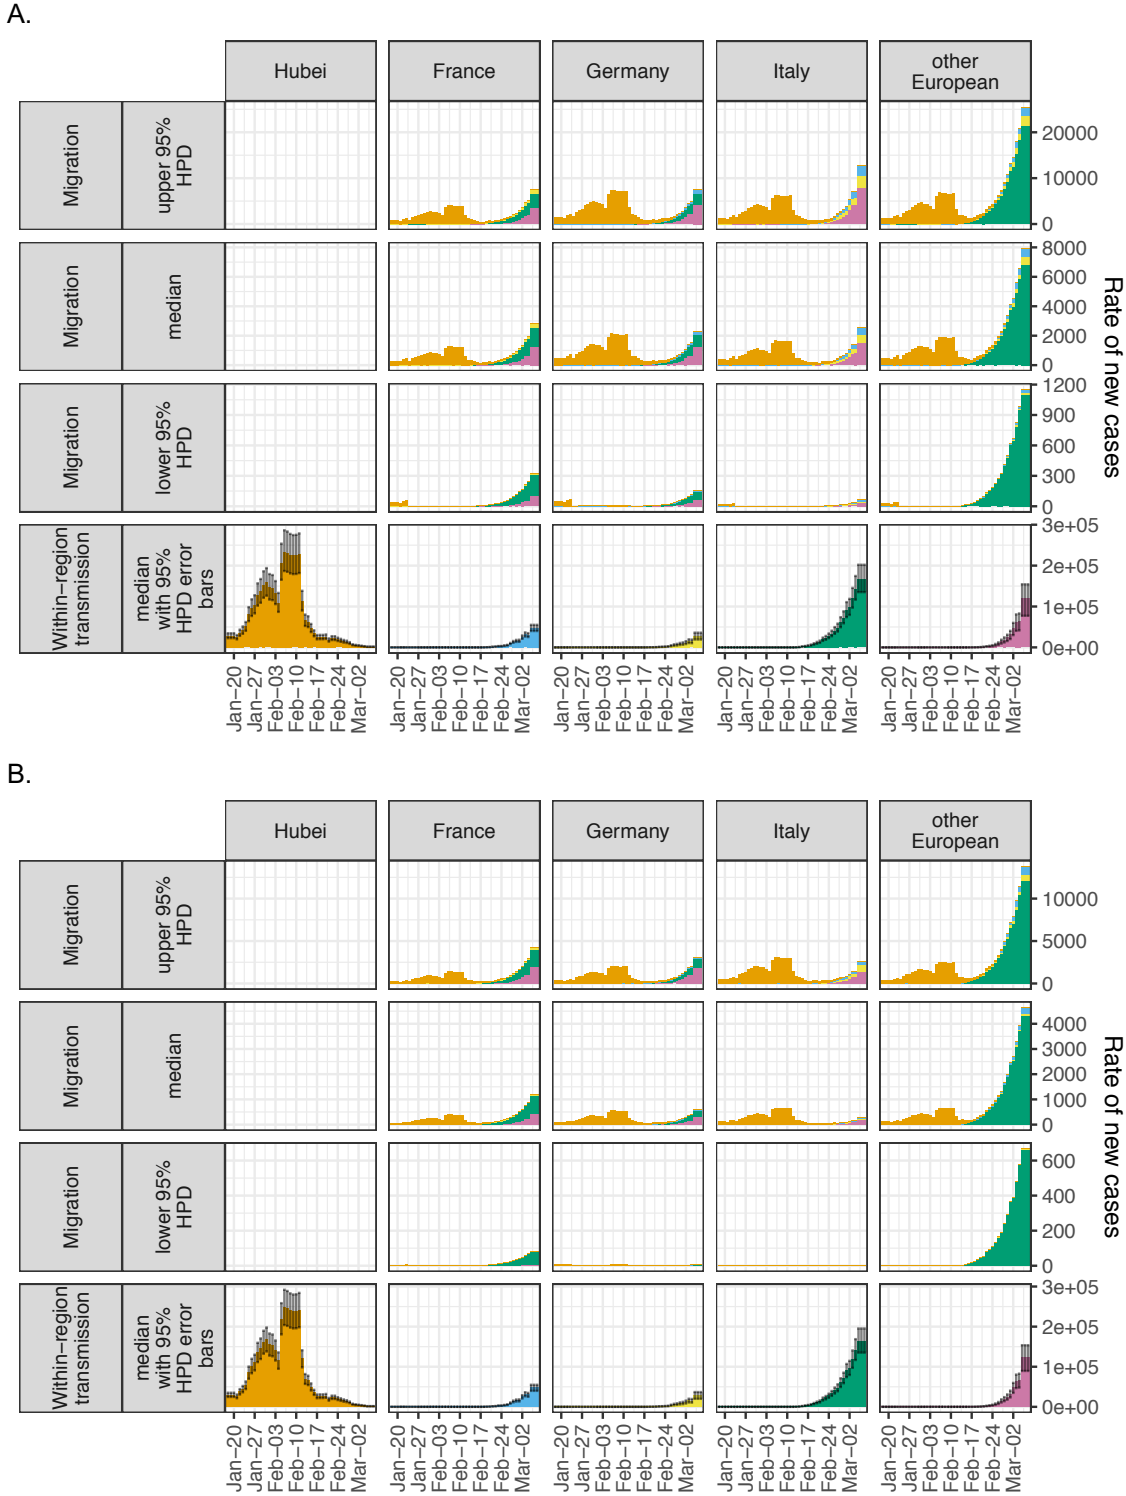

**Fig. S7.** Estimated rate of new cases from migration compared with the rate of new cases from within-region transmission A) using the migration rate prior as in the main analysis and B) using a lower migration rate prior:  $\text{Lognormal}(-2.29, 1.25)$ . Under the lower prior, median time until travel is 10 years and the 95% IQR is 1.3 days – 78 years. For each day, we multiplied the (smoothed) number of newly confirmed cases in each source region by the posterior sample of migration rates from source to sink. The upper and lower bounds of the 95% HPD interval and the median of these



rates are show in the top three rows. We also multiplied the (smoothed) number of newly confirmed cases in each sink region by the posterior sample of transmission rates for the region. The median of these rates is shown in the bottom row, with error bars showing the upper and lower bounds of the 95% HPD interval. Dates are lagged 5 days to account for a 5-day delay between infection and migration or onward transmission and daily case counts were smoothed by taking a rolling 7-day average. Case data comes from the Johns Hopkins Center for Systems Science and Engineering (<https://github.com/CSSEGISandData/COVID-19>). IQR = inter-quartile range; HPD = highest posterior density.

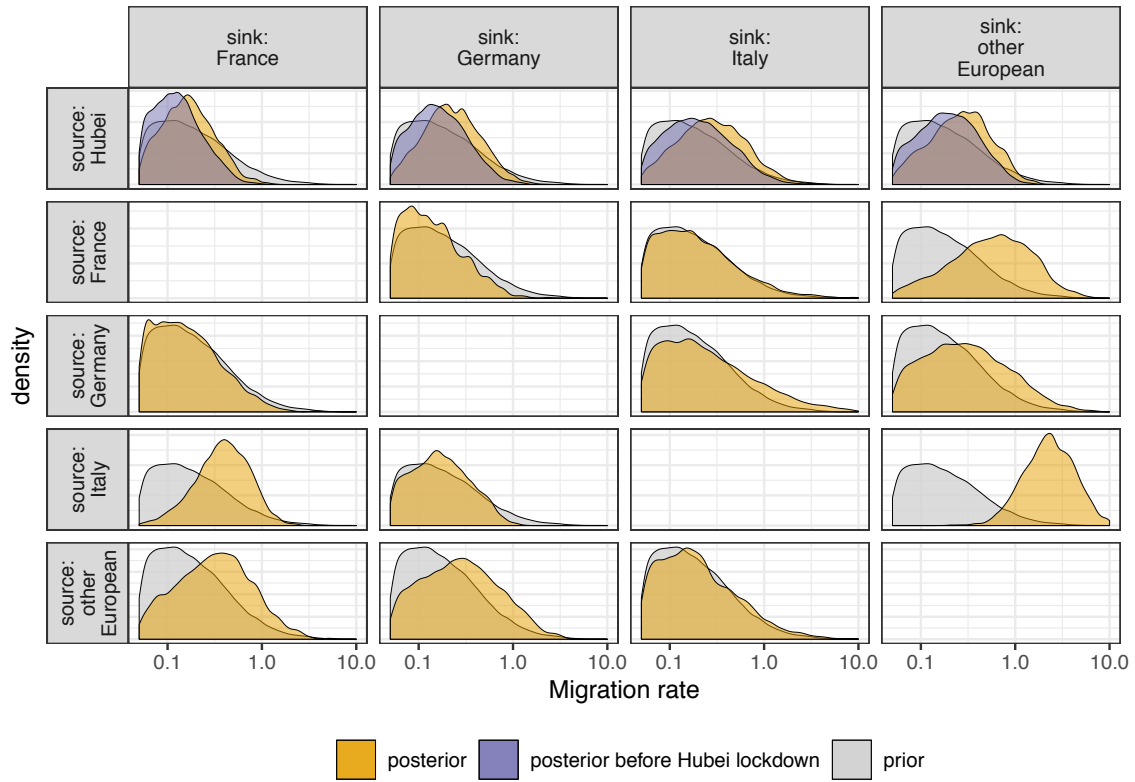

**Figure S8.** Posterior distributions (yellow for rates out of Hubei before 23 Jan. 2020 and rates between non-Hubei demes, purple for rates out of Hubei after 23 Jan. 2020) compared to the prior distribution (grey) using the same sequences as in the main analysis with a lower migration rate prior:  $\text{Lognormal}(-2.29, 1.25)$ .

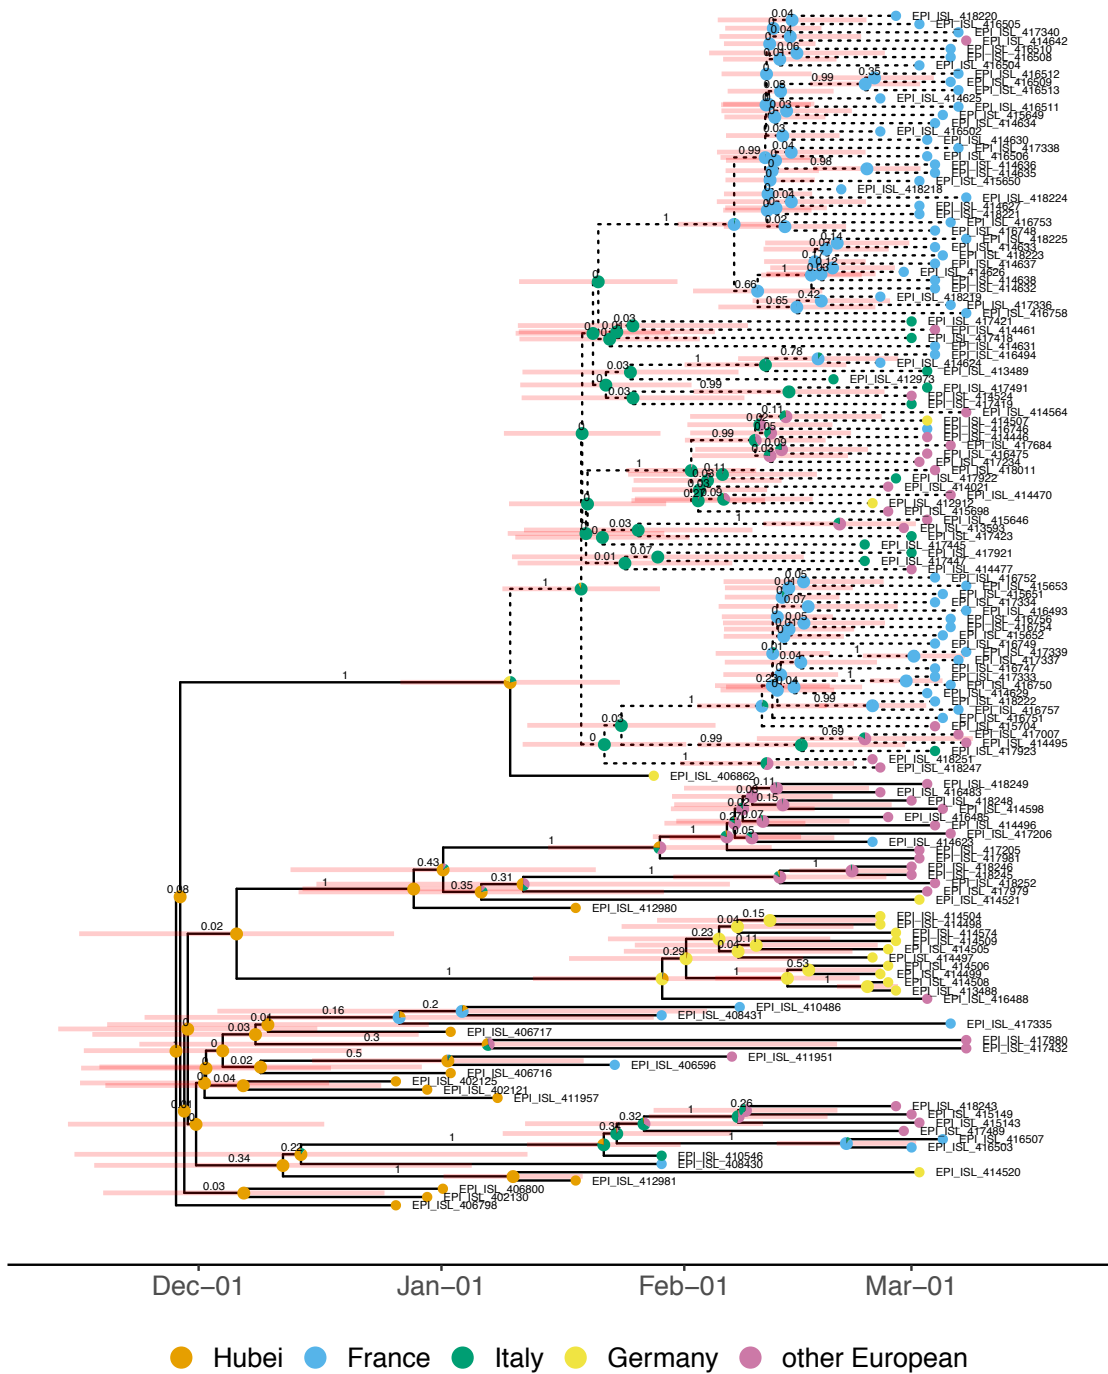

**Fig S9.** Maximum clade credibility tree using the same sequences as in the main analysis with a lower migration rate prior: Lognormal(-2.29, 1.25). The clade of A2a sequences analyzed is highlighted with dashed branches. The values above the branches are the posterior clade probabilities and the pale red bars show the 95% highest posterior density interval for node ages. The pie charts at internal nodes show the posterior probability that the ancestor was located in each deme (note that we assumed the root of the tree was in Hubei with probability 1). The deme for each tip is the deme in which the sequence was collected, irrespective of travel history. Tips are annotated with GISAID accession identifiers.

**Table S1.** Sequence information for the “other European” deme in the main analysis. Case and death data are from the Johns Hopkins Center for Systems Science and Engineering (<https://github.com/CSSEGISandData/COVID-19>). The number of sequences collected refers to the number of genome sequences available on GISAID (<https://www.gisaid.org/>). No. = number, Seqs. = sequences.

| <b>Country</b> | <b>No. seqs. included</b> | <b>No. confirmed deaths as of 8 Mar. 2020</b> | <b>No. confirmed cases as of 8 Mar. 2020</b> | <b>No. seqs. before down-sampling</b> |
|----------------|---------------------------|-----------------------------------------------|----------------------------------------------|---------------------------------------|
| Spain          | 18                        | 17                                            | 673                                          | 26                                    |
| Netherlands    | 4                         | 3                                             | 265                                          | 107                                   |
| United Kingdom | 4                         | 3                                             | 273                                          | 172                                   |
| Switzerland    | 3                         | 2                                             | 337                                          | 49                                    |
| Belgium        | 1                         | 0                                             | 200                                          | 46                                    |
| Czech Republic | 1                         | 0                                             | 31                                           | 1                                     |
| Denmark        | 1                         | 0                                             | 35                                           | 9                                     |
| Finland        | 1                         | 0                                             | 23                                           | 13                                    |
| Iceland        | 1                         | 0                                             | 50                                           | 54                                    |
| Ireland        | 1                         | 0                                             | 19                                           | 9                                     |
| Luxembourg     | 1                         | 0                                             | 3                                            | 1                                     |
| Norway         | 1                         | 0                                             | 176                                          | 8                                     |
| Poland         | 1                         | 0                                             | 11                                           | 1                                     |
| Portugal       | 1                         | 0                                             | 30                                           | 19                                    |
| Slovakia       | 1                         | 0                                             | 3                                            | 4                                     |
| Sweden         | 1                         | 0                                             | 203                                          | 1                                     |

**Table S2.** Sequence information for the “other European” deme in the sensitivity analysis with down-sampling based on death data from 28 Mar. 2020. Case and death data are from the Johns Hopkins Center for Systems Science and Engineering (<https://github.com/CSSEGISandData/COVID-19>). The number of sequences collected refers to the number of genome sequences available on GISAID (<https://www.gisaid.org/>). No. = number, Seqs. = sequences.

| <b>Country</b> | <b>No. seqs. included</b> | <b>No. confirmed deaths as of 28 Mar. 2020</b> | <b>No. confirmed cases as of 28 Mar. 2020</b> | <b>No. seqs. before down-sampling</b> |
|----------------|---------------------------|------------------------------------------------|-----------------------------------------------|---------------------------------------|
| Spain          | 26                        | 5982                                           | 73235                                         | 26                                    |
| United Kingdom | 11                        | 1021                                           | 17312                                         | 172                                   |
| Netherlands    | 7                         | 640                                            | 9819                                          | 107                                   |
| Belgium        | 5                         | 353                                            | 9134                                          | 46                                    |
| Switzerland    | 4                         | 264                                            | 14076                                         | 49                                    |
| Denmark        | 2                         | 65                                             | 2366                                          | 9                                     |
| Portugal       | 2                         | 100                                            | 5170                                          | 19                                    |
| Czech Republic | 1                         | 11                                             | 2631                                          | 1                                     |
| Finland        | 1                         | 9                                              | 1167                                          | 13                                    |
| Iceland        | 1                         | 2                                              | 963                                           | 54                                    |
| Ireland        | 1                         | 36                                             | 2415                                          | 9                                     |
| Luxembourg     | 1                         | 18                                             | 1831                                          | 1                                     |
| Norway         | 1                         | 23                                             | 4015                                          | 8                                     |
| Poland         | 1                         | 18                                             | 1638                                          | 1                                     |
| Slovakia       | 1                         | 0                                              | 292                                           | 4                                     |
| Sweden         | 1                         | 105                                            | 3447                                          | 1                                     |

**Table S3.** Sequence information for the sensitivity analysis with sequences from the A2a clade from all global regions. Location is the location of sample collection, as recorded in the Nextstrain metadata (previously available at <https://github.com/nextstrain/ncov>, as of publication the metadata is available for download from GISAID, <https://www.gisaid.org/>). Date is the date of sample collection, as given on GISAID. No. = number; Seq. = sequence.

| <b>Deme</b>             | <b>No. seqs.</b> | <b>Locations</b>                                                                                                                                                                                                                                   | <b>First seq. date</b> | <b>Last seq. date</b> |
|-------------------------|------------------|----------------------------------------------------------------------------------------------------------------------------------------------------------------------------------------------------------------------------------------------------|------------------------|-----------------------|
| Africa                  | 8                | Nigeria (1), South Africa (1), Senegal (4), Algeria (2)                                                                                                                                                                                            | 27.02.2020             | 08.03.2020            |
| Asia & Oceania          | 8                | Taiwan (1), Vietnam (3), Georgia (1), New Zealand (2), Australia (1)                                                                                                                                                                               | 02.03.2020             | 08.03.2020            |
| Europe                  | 60               | Belgium (1), Czech Republic (1), Denmark (1), Finland (1), France (20), Germany (1), Iceland (1), Ireland (1), Italy (12), Luxembourg (1), Netherlands (4), Norway (1), Portugal (1), Slovakia (1), Spain (6), Switzerland (3), United Kingdom (4) | 20.02.2020             | 08.03.2020            |
| North America           | 11               | Mexico (1), USA (3), Canada (7)                                                                                                                                                                                                                    | 27.02.2020             | 08.03.2020            |
| South & Central America | 16               | Brazil (13), Chile (1), Panama (1), Colombia (1)                                                                                                                                                                                                   | 25.02.2020             | 06.03.2020            |

**Table S4.** Sequence information for the European deme in the sensitivity analysis with sequences from the A2a clade from all global regions. Confirmed case and death data are from the Johns Hopkins Center for Systems Science and Engineering (<https://github.com/CSSEGISandData/COVID-19>). The number of sequences collected refers to the number of genome sequences available on GISAID (<https://www.gisaid.org/>). No. = number, Seqs. = sequences.

| <b>Country</b> | <b>No. seqs. included</b> | <b>No. confirmed deaths as of 8 Mar. 2020</b> | <b>No. confirmed cases as of 8 Mar. 2020</b> | <b>No. A2a seqs. before down-sampling</b> |
|----------------|---------------------------|-----------------------------------------------|----------------------------------------------|-------------------------------------------|
| Belgium        | 1                         | 0                                             | 200                                          | 40                                        |
| Czech Republic | 1                         | 0                                             | 31                                           | 1                                         |
| Denmark        | 1                         | 0                                             | 35                                           | 9                                         |
| Finland        | 1                         | 0                                             | 23                                           | 8                                         |
| France         | 20                        | 19                                            | 1126                                         | 58                                        |
| Germany        | 1                         | 0                                             | 1040                                         | 2                                         |
| Iceland        | 1                         | 0                                             | 50                                           | 53                                        |
| Ireland        | 1                         | 0                                             | 19                                           | 8                                         |
| Italy          | 12                        | 366                                           | 7375                                         | 12                                        |
| Luxembourg     | 1                         | 0                                             | 3                                            | 1                                         |
| Netherlands    | 4                         | 3                                             | 265                                          | 64                                        |
| Norway         | 1                         | 0                                             | 176                                          | 1                                         |
| Portugal       | 1                         | 0                                             | 30                                           | 19                                        |
| Slovakia       | 1                         | 0                                             | 3                                            | 3                                         |
| Spain          | 6                         | 17                                            | 673                                          | 6                                         |
| Switzerland    | 3                         | 2                                             | 337                                          | 48                                        |
| United Kingdom | 4                         | 3                                             | 273                                          | 101                                       |

**Table S5.** Median inferred number of introductions from each deme to each other deme amongst the analyzed cases in the analysis with sequences from the A2a clade from all global regions. Values in brackets are the upper and lower bound of the 95% highest posterior density interval.

| <b>Source / sink</b>               | <b>Africa</b> | <b>Asia &amp; Oceania</b> | <b>Europe</b> | <b>North America</b> | <b>South &amp; Central America</b> |
|------------------------------------|---------------|---------------------------|---------------|----------------------|------------------------------------|
| <b>Africa</b>                      | -             | 0: [0, 1]                 | 0: [0, 1]     | 0: [0, 1]            | 0: [0, 1]                          |
| <b>Asia &amp; Oceania</b>          | 1: [0, 3]     | -                         | 0: [0, 2]     | 3: [0, 8]            | 3: [0, 6]                          |
| <b>Europe</b>                      | 3: [0, 5]     | 5: [0, 9]                 | -             | 8: [2, 14]           | 8: [3, 13]                         |
| <b>North America</b>               | 0: [0, 2]     | 0: [0, 2]                 | 0: [0, 1]     | -                    | 0: [0, 3]                          |
| <b>South &amp; Central America</b> | 0: [0, 1]     | 0: [0, 1]                 | 0: [0, 1]     | 0: [0, 1]            | -                                  |



**Table S6.** GISAID acknowledgements. We gratefully acknowledge the following originating laboratories responsible for obtaining the specimens, as well as the submitting laboratories where the genome data were generated and shared via GISAID, on which this research is based. All submitters of data may be contacted directly via [www.gisaid.org](http://www.gisaid.org). Analysis codes are as follows: a = the main analysis, b = the analysis with down-sampling based on death data from 28 Mar. 2020, c = the analysis with sequences from the A2a clade from all global regions.

| Nextstrain sample name  | GISAID Accession ID | Date       | Originating lab                                                       | Submitting lab                                                                                                       | Analyses used in |
|-------------------------|---------------------|------------|-----------------------------------------------------------------------|----------------------------------------------------------------------------------------------------------------------|------------------|
| Algeria/G0638_2264/2020 | EPI_ISL_418241      | 02.03.2020 | NIC Viral Respiratory Unit - Institut Pasteur of Algeria              | National Reference Center for Viruses of Respiratory Infections, Institut Pasteur, Paris                             | c                |
| Algeria/G0640_2265/2020 | EPI_ISL_418242      | 08.03.2020 | NIC Viral Respiratory Unit - Institut Pasteur of Algeria              | National Reference Center for Viruses of Respiratory Infections, Institut Pasteur, Paris                             | c                |
| Australia/NSW27/2020    | EPI_ISL_417390      | 08.03.2020 | Centre for Infectious Diseases and Microbiology Public Health         | NSW Health Pathology - Institute of Clinical Pathology and Medical Research; Westmead Hospital; University of Sydney | c                |
| Belgium/DBA-03032/2020  | EPI_ISL_416475      | 03.03.2020 | KU Leuven, Clinical and Epidemiological Virology                      | KU Leuven, Clinical and Epidemiological Virology                                                                     | a                |
| Belgium/GMH-03022/2020  | EPI_ISL_416468      | 02.03.2020 | KU Leuven, Clinical and Epidemiological Virology                      | KU Leuven, Clinical and Epidemiological Virology                                                                     | b                |
| Belgium/KA-03042/2020   | EPI_ISL_417424      | 04.03.2020 | KU Leuven, Clinical and Epidemiological Virology                      | KU Leuven, Clinical and Epidemiological Virology                                                                     | b                |
| Belgium/NKR-030645/2020 | EPI_ISL_418795      | 06.03.2020 | KU Leuven, Clinical and Epidemiological Virology                      | KU Leuven, Clinical and Epidemiological Virology                                                                     | b                |
| Belgium/SN-03031/2020   | EPI_ISL_416469      | 03.03.2020 | KU Leuven, Clinical and Epidemiological Virology                      | KU Leuven, Clinical and Epidemiological Virology                                                                     | c                |
| Belgium/ULG-3665/2020   | EPI_ISL_417009      | 07.03.2020 | Department of Clinical Microbiology                                   | GIGA Medical Genomics                                                                                                | b                |
| Belgium/ULG-3843/2020   | EPI_ISL_417012      | 08.03.2020 | Department of Clinical Microbiology                                   | GIGA Medical Genomics                                                                                                | b                |
| Brazil/BA-312/2020      | EPI_ISL_415105      | 04.03.2020 | Laboratorio Central de Saude Publica Professor Goncalo Moniz LACEN/BA | Instituto Oswaldo Cruz FIOCRUZ - Laboratory of Respiratory Viruses and Measles (LVRS)                                | c                |
| Brazil/RJ-314/2020      | EPI_ISL_414045      | 04.03.2020 | LACEN RJ - Laboratorio Central de Saude Publica Noel Nutels           | Instituto Oswaldo Cruz FIOCRUZ - Laboratory of Respiratory Viruses and Measles (LVRS)                                | c                |
| Brazil/SPBR-01/2020     | EPI_ISL_412964      | 25.02.2020 | Hospital Israelita Albert Einstein                                    | Instituto Adolfo Lutz Interdisciplinary Procedures Center Strategic Laboratory                                       | c                |

|                            |                |            |                                                   |                                                                                                                          |      |
|----------------------------|----------------|------------|---------------------------------------------------|--------------------------------------------------------------------------------------------------------------------------|------|
| Brazil/SPBR-03/2020        | EPI_ISL_414014 | 02.03.2020 | Hospital Israelita Albert Einstein                | Instituto Adolfo Lutz, Interdisciplinary Procedures Center, Strategic Laboratory                                         | c    |
| Brazil/SPBR-04/2020        | EPI_ISL_414017 | 04.03.2020 | Hospital Sao Joaquim Beneficencia Portuguesa      | Instituto Adolfo Lutz, Interdisciplinary Procedures Center, Strategic Laboratory                                         | c    |
| Brazil/SPBR-05/2020        | EPI_ISL_414016 | 29.02.2020 | Hospital Sao Joaquim Beneficencia Portuguesa      | Instituto Adolfo Lutz, Interdisciplinary Procedures Center, Strategic Laboratory                                         | c    |
| Brazil/SPBR-06/2020        | EPI_ISL_414015 | 29.02.2020 | Hospital Sao Joaquim Beneficencia Portuguesa      | Instituto Adolfo Lutz, Interdisciplinary Procedures Center, Strategic Laboratory                                         | c    |
| Brazil/SPBR-07/2020        | EPI_ISL_416028 | 03.03.2020 | National Influenza Center - Instituto Adolfo Lutz | Instituto Adolfo Lutz, Interdisciplinary Procedures Center, Strategic Laboratory                                         | c    |
| Brazil/SPBR-08/2020        | EPI_ISL_416029 | 04.03.2020 | Laboratorio Fleury                                | Instituto Adolfo Lutz, Interdisciplinary Procedures Center, Strategic Laboratory                                         | c    |
| Brazil/SPBR-09/2020        | EPI_ISL_416031 | 04.03.2020 | National Influenza Center - Instituto Adolfo Lutz | Instituto Adolfo Lutz, Interdisciplinary Procedures Center, Strategic Laboratory                                         | c    |
| Brazil/SPBR-12/2020        | EPI_ISL_416034 | 04.03.2020 | Hospital Israelita Albert Einstein                | Instituto Adolfo Lutz, Interdisciplinary Procedures Center, Strategic Laboratory                                         | c    |
| Brazil/SPBR-13/2020        | EPI_ISL_416035 | 05.03.2020 | National Influenza Center - Instituto Adolfo Lutz | Instituto Adolfo Lutz, Interdisciplinary Procedures Center, Strategic Laboratory                                         | c    |
| Brazil/SPBR-14/2020        | EPI_ISL_416036 | 05.03.2020 | National Influenza Center - Instituto Adolfo Lutz | Instituto Adolfo Lutz, Interdisciplinary Procedures Center, Strategic Laboratory                                         | c    |
| Canada/ON_PHL 0743/2020    | EPI_ISL_418346 | 07.03.2020 | Public Health Ontario Laboratories                | Public Health Ontario Laboratories                                                                                       | c    |
| Canada/ON_PHL 2653/2020    | EPI_ISL_418371 | 07.03.2020 | Public Health Ontario Laboratories                | Public Health Ontario Laboratories                                                                                       | c    |
| Canada/ON_PHL 3350/2020    | EPI_ISL_418366 | 05.03.2020 | Public Health Ontario Laboratories                | Public Health Ontario Laboratories                                                                                       | c    |
| Canada/ON_PHL 3650/2020    | EPI_ISL_418349 | 07.03.2020 | Public Health Ontario Laboratories                | Public Health Ontario Laboratories                                                                                       | c    |
| Canada/ON_PHL 3680/2020    | EPI_ISL_418348 | 08.03.2020 | Public Health Ontario Laboratories                | Public Health Ontario Laboratories                                                                                       | c    |
| Canada/ON_PHL 8751/2020    | EPI_ISL_418345 | 29.02.2020 | Public Health Ontario Laboratories                | Public Health Ontario Laboratories                                                                                       | c    |
| Canada/ON_PHL U8150/2020   | EPI_ISL_418355 | 08.03.2020 | Public Health Ontario Laboratories                | Public Health Ontario Laboratories                                                                                       | c    |
| Chile/Santiago-2/2020      | EPI_ISL_414580 | 05.03.2020 | Clinica Santa Maria, Santiago, Chile              | Instituto de Salud Publica de Chile                                                                                      | c    |
| China/WH-09/2020           | EPI_ISL_411957 | 08.01.2020 | unknown                                           | Key Laboratory of Human Diseases, Comparative Medicine, Institute of Laboratory Animal Science                           | a, b |
| Colombia/Bogota 78390/2020 | EPI_ISL_418262 | 06.03.2020 | Instituto Nacional de Salud                       | Instituto Nacional de Salud Universidad Cooperativa de Colombia Instituto Alexander von Humboldt Imperial College-London | c    |

|                          |                |            |                                                                                                           |                                                                                |         |
|--------------------------|----------------|------------|-----------------------------------------------------------------------------------------------------------|--------------------------------------------------------------------------------|---------|
|                          |                |            |                                                                                                           | London School of Hygiene & Tropical Medicine                                   |         |
| CzechRepublic/951/2020   | EPI_ISL_414477 | 01.03.2020 | The National Institute of Public Health Center for Epidemiology and Microbiology                          | State Veterinary Institute Prague                                              | a, c, b |
| Denmark/SSI-04/2020      | EPI_ISL_416153 | 02.03.2020 | Department of Virus and Microbiological Special diagnostics, Statens Serum Institut, Copenhagen, Denmark. | ViFU                                                                           | b       |
| Denmark/SSI-05/2020      | EPI_ISL_416140 | 02.03.2020 | Department of Virus and Microbiological Special diagnostics, Statens Serum Institut, Copenhagen, Denmark. | Statens Serum Institute                                                        | c       |
| Denmark/SSI-101/2020     | EPI_ISL_415646 | 03.03.2020 | Department of Virus and Microbiological Special diagnostics, Statens Serum Institut, Copenhagen, Denmark. | ViFU                                                                           | a       |
| Denmark/SSI-104/2020     | EPI_ISL_415648 | 03.03.2020 | Department of Virus and Microbiological Special diagnostics, Statens Serum Institut, Copenhagen, Denmark. | ViFU                                                                           | b       |
| England/20099107406/2020 | EPI_ISL_415131 | 29.02.2020 | Respiratory Virus Unit, Microbiology Services Colindale, Public Health England                            | Respiratory Virus Unit, Microbiology Services Colindale, Public Health England | c       |
| England/200991076/2020   | EPI_ISL_414524 | 01.03.2020 | Respiratory Virus Unit, Microbiology Services Colindale, Public Health England                            | Respiratory Virus Unit, Microbiology Services Colindale, Public Health England | a, b    |
| England/20100121007/2020 | EPI_ISL_415141 | 29.02.2020 | Respiratory Virus Unit, Microbiology Services Colindale, Public Health England                            | Respiratory Virus Unit, Microbiology Services Colindale, Public Health England | b       |
| England/20100122107/2020 | EPI_ISL_415143 | 02.03.2020 | Respiratory Virus Unit, Microbiology Services Colindale, Public Health England                            | Respiratory Virus Unit, Microbiology Services Colindale, Public Health England | a, b    |
| England/20102000106/2020 | EPI_ISL_415144 | 27.02.2020 | Respiratory Virus Unit, Microbiology Services Colindale, Public Health England                            | Respiratory Virus Unit, Microbiology Services Colindale, Public Health England | b       |
| England/20102000506/2020 | EPI_ISL_415147 | 01.03.2020 | Respiratory Virus Unit, Microbiology Services Colindale, Public Health England                            | Respiratory Virus Unit, Microbiology Services Colindale, Public Health England | c       |

|                               |                    |            |                                                                                                                               |                                                                                                   |      |
|-------------------------------|--------------------|------------|-------------------------------------------------------------------------------------------------------------------------------|---------------------------------------------------------------------------------------------------|------|
| England/201020<br>68506/2020  | EPI_ISL<br>_415149 | 01.03.2020 | Respiratory Virus Unit,<br>Microbiology Services<br>Colindale, Public<br>Health England                                       | Respiratory Virus Unit,<br>Microbiology Services<br>Colindale, Public Health<br>England           | a, b |
| England/201020<br>88002/2020  | EPI_ISL<br>_417216 | 25.02.2020 | Respiratory Virus Unit,<br>Microbiology Services<br>Colindale, Public<br>Health England                                       | Respiratory Virus Unit,<br>Microbiology Services<br>Colindale, Public Health<br>England           | b    |
| England/201040<br>08702/2020  | EPI_ISL<br>_417230 | 02.03.2020 | Respiratory Virus Unit,<br>Microbiology Services<br>Colindale, Public<br>Health England                                       | Respiratory Virus Unit,<br>Microbiology Services<br>Colindale, Public Health<br>England           | c    |
| England/201040<br>08802/2020  | EPI_ISL<br>_417231 | 03.03.2020 | Respiratory Virus Unit,<br>Microbiology Services<br>Colindale, Public<br>Health England                                       | Respiratory Virus Unit,<br>Microbiology Services<br>Colindale, Public Health<br>England           | b    |
| England/201040<br>09102/2020  | EPI_ISL<br>_417234 | 02.03.2020 | Respiratory Virus Unit,<br>Microbiology Services<br>Colindale, Public<br>Health England                                       | Respiratory Virus Unit,<br>Microbiology Services<br>Colindale, Public Health<br>England           | a, b |
| England/201090<br>93606/2020  | EPI_ISL<br>_417285 | 06.03.2020 | Respiratory Virus Unit,<br>Microbiology Services<br>Colindale, Public<br>Health England                                       | Respiratory Virus Unit,<br>Microbiology Services<br>Colindale, Public Health<br>England           | b    |
| England/201090<br>98806/2020  | EPI_ISL<br>_417295 | 08.03.2020 | Respiratory Virus Unit,<br>Microbiology Services<br>Colindale, Public<br>Health England                                       | Respiratory Virus Unit,<br>Microbiology Services<br>Colindale, Public Health<br>England           | b    |
| England/201100<br>00706/2020  | EPI_ISL<br>_417302 | 05.03.2020 | Respiratory Virus Unit,<br>Microbiology Services<br>Colindale, Public<br>Health England                                       | Respiratory Virus Unit,<br>Microbiology Services<br>Colindale, Public Health<br>England           | c    |
| Finland/FIN-<br>455/2020      | EPI_ISL<br>_414642 | 08.03.2020 | Department of Virology<br>and Immunology,<br>University of Helsinki<br>and Helsinki University<br>Hospital, Huslab<br>Finland | Department of Virology,<br>Faculty of Medicine,<br>University of Helsinki,<br>Helsinki, Finland   | a    |
| Finland/FIN0303<br>2020C/2020 | EPI_ISL<br>_413604 | 03.03.2020 | Department of Virology<br>and Immunology,<br>University of Helsinki<br>and Helsinki University<br>Hospital, Huslab<br>Finland | Department of Virology,<br>Faculty of Medicine,<br>University of Helsinki,<br>Helsinki, Finland   | c, b |
| France/B1623/20<br>20         | EPI_ISL<br>_418219 | 26.02.2020 | CHU - Hopital Cavale<br>Blanche - Labo. de<br>Virologie                                                                       | National Reference Center<br>for Viruses of Respiratory<br>Infections, Institut Pasteur,<br>Paris | a, b |
| France/B2330/20<br>20         | EPI_ISL<br>_416502 | 26.02.2020 | CHRU Pontchaillou -<br>Laboratoire de<br>Virologie                                                                            | National Reference Center<br>for Viruses of Respiratory<br>Infections, Institut Pasteur,<br>Paris | a, b |
| France/B2334/20<br>20         | EPI_ISL<br>_416503 | 01.03.2020 | CHRU Pontchaillou -<br>Laboratoire de<br>Virologie                                                                            | National Reference Center<br>for Viruses of Respiratory                                           | a, b |

|                                   |                |            |                                              |                                                                                          |         |
|-----------------------------------|----------------|------------|----------------------------------------------|------------------------------------------------------------------------------------------|---------|
|                                   |                |            |                                              | Infections, Institut Pasteur, Paris                                                      |         |
| France/B2335/2020                 | EPI_ISL_416504 | 02.03.2020 | CHRU Pontchaillou - Laboratoire de Virologie | National Reference Center for Viruses of Respiratory Infections, Institut Pasteur, Paris | a, b    |
| France/B2336/2020                 | EPI_ISL_416505 | 02.03.2020 | CHRU Pontchaillou - Laboratoire de Virologie | National Reference Center for Viruses of Respiratory Infections, Institut Pasteur, Paris | a, b    |
| France/B2337/2020                 | EPI_ISL_416506 | 03.03.2020 | CHRU Pontchaillou - Laboratoire de Virologie | National Reference Center for Viruses of Respiratory Infections, Institut Pasteur, Paris | a, c, b |
| France/B2340/2020                 | EPI_ISL_416507 | 05.03.2020 | CHRU Pontchaillou - Laboratoire de Virologie | National Reference Center for Viruses of Respiratory Infections, Institut Pasteur, Paris | a, b    |
| France/B2343/2020                 | EPI_ISL_416508 | 06.03.2020 | CHRU Pontchaillou - Laboratoire de Virologie | National Reference Center for Viruses of Respiratory Infections, Institut Pasteur, Paris | a, b    |
| France/B2344/2020                 | EPI_ISL_416509 | 06.03.2020 | CHRU Pontchaillou - Laboratoire de Virologie | National Reference Center for Viruses of Respiratory Infections, Institut Pasteur, Paris | a, c, b |
| France/B2346/2020                 | EPI_ISL_416510 | 06.03.2020 | CHRU Pontchaillou - Laboratoire de Virologie | National Reference Center for Viruses of Respiratory Infections, Institut Pasteur, Paris | a, b    |
| France/B2348/2020                 | EPI_ISL_416511 | 07.03.2020 | CHRU Pontchaillou - Laboratoire de Virologie | National Reference Center for Viruses of Respiratory Infections, Institut Pasteur, Paris | a, b    |
| France/B2349/2020                 | EPI_ISL_416512 | 07.03.2020 | CHRU Pontchaillou - Laboratoire de Virologie | National Reference Center for Viruses of Respiratory Infections, Institut Pasteur, Paris | a, c, b |
| France/B2351/2020                 | EPI_ISL_416513 | 07.03.2020 | CHRU Pontchaillou - Laboratoire de Virologie | National Reference Center for Viruses of Respiratory Infections, Institut Pasteur, Paris | a, b    |
| France/BFC2094/2020               | EPI_ISL_415651 | 05.03.2020 | Unknown                                      | National Reference Center for Viruses of Respiratory Infections, Institut Pasteur, Paris | a, b    |
| France/BFC2147/2020               | EPI_ISL_415652 | 05.03.2020 | unknown                                      | National Reference Center for Viruses of Respiratory Infections, Institut Pasteur, Paris | a, b    |
| France/Bourg-en-Bresse_06678/2020 | EPI_ISL_416757 | 07.03.2020 | Centre Hospitalier de Bourg en Bresse        | CNR Virus des Infections Respiratoires - France SUD                                      | a, c, b |

|                                   |                |            |                                                                                                      |                                                                                          |         |
|-----------------------------------|----------------|------------|------------------------------------------------------------------------------------------------------|------------------------------------------------------------------------------------------|---------|
| France/Bourg-en-Bresse_06813/2020 | EPI_ISL_417340 | 07.03.2020 | Centre Hospitalier de Bourg en Bresse                                                                | CNR Virus des Infections Respiratoires - France SUD                                      | a, b    |
| France/CVL2000/2020               | EPI_ISL_418222 | 04.03.2020 | CHRU Bretonneau - Serv. Bacterio-Virol.                                                              | National Reference Center for Viruses of Respiratory Infections, Institut Pasteur, Paris | a, b    |
| France/Clermont-Ferrand_650/2020  | EPI_ISL_416752 | 04.03.2020 | CHU Gabriel Montpied                                                                                 | CNR Virus des Infections Respiratoires - France SUD                                      | a, b    |
| France/Clermont-Ferrand_651/2020  | EPI_ISL_416751 | 05.03.2020 | CHU Gabriel Montpied                                                                                 | CNR Virus des Infections Respiratoires - France SUD                                      | a, c, b |
| France/GE1583/2020                | EPI_ISL_414623 | 25.02.2020 | Laboratoire de Virologie Institut de Virologie - INSERM U 1109 Hopitaux Universitaires de Strasbourg | National Reference Center for Viruses of Respiratory Infections, Institut Pasteur, Paris | a, b    |
| France/GE1973/2020                | EPI_ISL_414631 | 04.03.2020 | Hopital Robert Debre Laboratoire de Virologie                                                        | National Reference Center for Viruses of Respiratory Infections, Institut Pasteur, Paris | a, c, b |
| France/GE1977/2020                | EPI_ISL_414632 | 04.03.2020 | Hopital Robert Debre Laboratoire de Virologie                                                        | National Reference Center for Viruses of Respiratory Infections, Institut Pasteur, Paris | a, b    |
| France/HF1465/2020                | EPI_ISL_418218 | 21.02.2020 | Centre Hospitalier Compiègne Laboratoire de Biologie                                                 | National Reference Center for Viruses of Respiratory Infections, Institut Pasteur, Paris | a, b    |
| France/HF1645/2020                | EPI_ISL_418220 | 28.02.2020 | Centre Hospitalier Compiègne Laboratoire de Biologie                                                 | National Reference Center for Viruses of Respiratory Infections, Institut Pasteur, Paris | a, c, b |
| France/HF1684/2020                | EPI_ISL_414626 | 29.02.2020 | unknown                                                                                              | National Reference Center for Viruses of Respiratory Infections, Institut Pasteur, Paris | a, b    |
| France/HF1795/2020                | EPI_ISL_414627 | 02.03.2020 | Centre Hospitalier Compiègne Laboratoire de Biologie                                                 | National Reference Center for Viruses of Respiratory Infections, Institut Pasteur, Paris | a, c, b |
| France/HF1813/2020                | EPI_ISL_418221 | 02.03.2020 | Centre Hospitalier Compiègne Laboratoire de Biologie                                                 | National Reference Center for Viruses of Respiratory Infections, Institut Pasteur, Paris | a, b    |
| France/HF1870/2020                | EPI_ISL_414629 | 03.03.2020 | Centre Hospitalier Compiègne Laboratoire de Biologie                                                 | National Reference Center for Viruses of Respiratory Infections, Institut Pasteur, Paris | a, b    |
| France/HF1871/2020                | EPI_ISL_414630 | 03.03.2020 | Centre Hospitalier Compiègne Laboratoire de Biologie                                                 | National Reference Center for Viruses of Respiratory                                     | a, b    |

|                     |                |            |                                                                                       |                                                                                          |         |
|---------------------|----------------|------------|---------------------------------------------------------------------------------------|------------------------------------------------------------------------------------------|---------|
|                     |                |            |                                                                                       | Infections, Institut Pasteur, Paris                                                      |         |
| France/HF1986/2020  | EPI_ISL_414634 | 04.03.2020 | Centre Hospitalier Compiegne Laboratoire de Biologie                                  | National Reference Center for Viruses of Respiratory Infections, Institut Pasteur, Paris | a, b    |
| France/HF1988/2020  | EPI_ISL_414635 | 04.03.2020 | Centre Hospitalier Compiegne Laboratoire de Biologie                                  | National Reference Center for Viruses of Respiratory Infections, Institut Pasteur, Paris | a, c, b |
| France/HF1989/2020  | EPI_ISL_414636 | 04.03.2020 | Centre Hospitalier Compiegne Laboratoire de Biologie                                  | National Reference Center for Viruses of Respiratory Infections, Institut Pasteur, Paris | a, b    |
| France/HF1993/2020  | EPI_ISL_414637 | 04.03.2020 | Centre Hospitalier Compiegne Laboratoire de Biologie                                  | National Reference Center for Viruses of Respiratory Infections, Institut Pasteur, Paris | a, b    |
| France/HF1995/2020  | EPI_ISL_414638 | 04.03.2020 | Centre Hospitalier Compiegne Laboratoire de Biologie                                  | National Reference Center for Viruses of Respiratory Infections, Institut Pasteur, Paris | a, b    |
| France/HF2039/2020  | EPI_ISL_415649 | 05.03.2020 | unknown                                                                               | National Reference Center for Viruses of Respiratory Infections, Institut Pasteur, Paris | a, b    |
| France/HF2060/2020  | EPI_ISL_418223 | 05.03.2020 | Centre Hospitalier Compiegne Laboratoire de Biologie                                  | National Reference Center for Viruses of Respiratory Infections, Institut Pasteur, Paris | a, b    |
| France/HF2150/2020  | EPI_ISL_418224 | 08.03.2020 | Centre Hospitalier Compiegne Laboratoire de Biologie                                  | National Reference Center for Viruses of Respiratory Infections, Institut Pasteur, Paris | a, b    |
| France/HF2151/2020  | EPI_ISL_415653 | 08.03.2020 | Centre Hospitalier Compiegne Laboratoire de Biologie                                  | National Reference Center for Viruses of Respiratory Infections, Institut Pasteur, Paris | a, c, b |
| France/HF2155/2020  | EPI_ISL_418225 | 08.03.2020 | Centre Hospitalier Compiegne Laboratoire de Biologie                                  | National Reference Center for Viruses of Respiratory Infections, Institut Pasteur, Paris | a, b    |
| France/HF2196/2020  | EPI_ISL_416493 | 08.03.2020 | CH Jean de Navarre Laboratoire de Biologie                                            | National Reference Center for Viruses of Respiratory Infections, Institut Pasteur, Paris | a, b    |
| France/IDF0372/2020 | EPI_ISL_406596 | 23.01.2020 | Department of Infectious and Tropical Diseases, Bichat Claude Bernard Hospital, Paris | National Reference Center for Viruses of Respiratory Infections, Institut Pasteur, Paris | a, b    |
| France/IDF0515/2020 | EPI_ISL_408430 | 29.01.2020 | Department of Infectious and Tropical Diseases, Bichat                                | National Reference Center for Viruses of Respiratory Infections, Institut Pasteur, Paris | a, b    |

|                        |                |            |                                                                                          |                                                                                          |         |
|------------------------|----------------|------------|------------------------------------------------------------------------------------------|------------------------------------------------------------------------------------------|---------|
|                        |                |            | Claude Bernard Hospital, Paris                                                           |                                                                                          |         |
| France/IDF0626/2020    | EPI_ISL_408431 | 29.01.2020 | Sorbonne Universite, Inserm et Assistance Publique-Hopitaux de Paris (Pitie Salpetriere) | National Reference Center for Viruses of Respiratory Infections, Institut Pasteur, Paris | a, b    |
| France/IDF1980/2020    | EPI_ISL_414633 | 04.03.2020 | Centre Hospitalier Rene Dubois Laboratoire de Microbiologie - Bat A                      | National Reference Center for Viruses of Respiratory Infections, Institut Pasteur, Paris | a, c, b |
| France/IDF2075/2020    | EPI_ISL_415650 | 02.03.2020 | Hopital Instruction des Armees - BEGIN                                                   | National Reference Center for Viruses of Respiratory Infections, Institut Pasteur, Paris | a, b    |
| France/Lyon_06042/2020 | EPI_ISL_417333 | 04.03.2020 | Institut des Agents Infectieux (IAI), Hospices Civils de Lyon                            | CNR Virus des Infections Respiratoires - France SUD                                      | a, b    |
| France/Lyon_06056/2020 | EPI_ISL_417334 | 04.03.2020 | Institut des Agents Infectieux (IAI), Hospices Civils de Lyon                            | CNR Virus des Infections Respiratoires - France SUD                                      | a, c, b |
| France/Lyon_06464/2020 | EPI_ISL_416753 | 06.03.2020 | Institut des Agents Infectieux (IAI) Hospices Civils de Lyon                             | CNR Virus des Infections Respiratoires - France SUD                                      | a, b    |
| France/Lyon_06487/2020 | EPI_ISL_416754 | 06.03.2020 | Institut des Agents Infectieux (IAI) Hospices Civils de Lyon                             | CNR Virus des Infections Respiratoires - France SUD                                      | a, b    |
| France/Lyon_06531/2020 | EPI_ISL_416756 | 06.03.2020 | Institut des Agents Infectieux (IAI) Hospices Civils de Lyon                             | CNR Virus des Infections Respiratoires - France SUD                                      | a, b    |
| France/Lyon_06573/2020 | EPI_ISL_417335 | 06.03.2020 | Institut des Agents Infectieux (IAI), Hospices Civils de Lyon                            | CNR Virus des Infections Respiratoires - France SUD                                      | a, b    |
| France/Lyon_06625/2020 | EPI_ISL_417337 | 07.03.2020 | Institut des Agents Infectieux (IAI), Hospices Civils de Lyon                            | CNR Virus des Infections Respiratoires - France SUD                                      | a, b    |
| France/Lyon_0668/2020  | EPI_ISL_417336 | 06.03.2020 | Institut des Agents Infectieux (IAI), Hospices Civils de Lyon                            | CNR Virus des Infections Respiratoires - France SUD                                      | a, b    |
| France/Lyon_06820/2020 | EPI_ISL_417339 | 08.03.2020 | Institut des Agents Infectieux (IAI), Hospices Civils de Lyon                            | CNR Virus des Infections Respiratoires - France SUD                                      | a, c, b |
| France/Lyon_0693/2020  | EPI_ISL_416758 | 08.03.2020 | Institut des Agents Infectieux (IAI) Hospices Civils de Lyon                             | CNR Virus des Infections Respiratoires - France SUD                                      | a, c, b |



|                                   |                |            |                                                                                                                         |                                                                                                                         |         |
|-----------------------------------|----------------|------------|-------------------------------------------------------------------------------------------------------------------------|-------------------------------------------------------------------------------------------------------------------------|---------|
| France/Lyon_487/2020              | EPI_ISL_416747 | 04.03.2020 | Institut des Agents Infectieux (IAI) Hospices Civils de Lyon                                                            | CNR Virus des Infections Respiratoires - France SUD                                                                     | a, c, b |
| France/Lyon_508/2020              | EPI_ISL_416748 | 04.03.2020 | Institut des Agents Infectieux (IAI) Hospices Civils de Lyon                                                            | CNR Virus des Infections Respiratoires - France SUD                                                                     | a, c, b |
| France/Lyon_683/2020              | EPI_ISL_416750 | 06.03.2020 | Institut des Agents Infectieux (IAI) Hospices Civils de Lyon                                                            | CNR Virus des Infections Respiratoires - France SUD                                                                     | a, c, b |
| France/Macon_06756/2020           | EPI_ISL_417338 | 07.03.2020 | Centre Hospitalier de Macon                                                                                             | CNR Virus des Infections Respiratoires - France SUD                                                                     | a, b    |
| France/N1620/2020                 | EPI_ISL_414624 | 26.02.2020 | Centre Hospitalier Universitaire de Rouen Laboratoire de Virologie                                                      | National Reference Center for Viruses of Respiratory Infections, Institut Pasteur, Paris                                | a, c, b |
| France/N2223/2020                 | EPI_ISL_416494 | 04.03.2020 | Centre Hospitalier Universitaire de Rouen Laboratoire de Virologie                                                      | National Reference Center for Viruses of Respiratory Infections, Institut Pasteur, Paris                                | a, c, b |
| France/PL1643/2020                | EPI_ISL_414625 | 26.02.2020 | Centre Hospitalier Regional Universitaire de Nantes Laboratoire de Virologie                                            | National Reference Center for Viruses of Respiratory Infections, Institut Pasteur, Paris                                | a, b    |
| France/RA739/2020                 | EPI_ISL_410486 | 08.02.2020 | CNR Virus des Infections Respiratoires - France SUD                                                                     | CNR Virus des Infections Respiratoires - France SUD                                                                     | a, b    |
| France/Valence_425/2020           | EPI_ISL_416746 | 03.03.2020 | CNR Virus des Infections Respiratoires - France SUD                                                                     | CNR Virus des Infections Respiratoires - France SUD                                                                     | a, c, b |
| France/Valence_532/2020           | EPI_ISL_416749 | 04.03.2020 | Centre Hospitalier de Valence                                                                                           | CNR Virus des Infections Respiratoires - France SUD                                                                     | a, b    |
| Georgia/Tb-273/2020               | EPI_ISL_416479 | 05.03.2020 | R. G. Lugar Center for Public Health Research, National Center for Disease Control and Public Health (NCDC) of Georgia. | R. G. Lugar Center for Public Health Research, National Center for Disease Control and Public Health (NCDC) of Georgia. | c       |
| Germany/Baden-Wuerttemberg-1/2020 | EPI_ISL_412912 | 25.02.2020 | State Health Office Baden-Wuerttemberg                                                                                  | Charite Universitatsmedizin Berlin, Institute of Virology                                                               | a, c, b |
| Germany/BavPat1/2020              | EPI_ISL_406862 | 28.01.2020 | Charite Universitatsmedizin Berlin, Institute of Virology; Institut fur Mikrobiologie der Bundeswehr, Munich            | Charite Universitatsmedizin Berlin, Institute of Virology                                                               | a, b    |
| Germany/BavPat2/2020              | EPI_ISL_414520 | 02.03.2020 | Bundeswehr Institute of Microbiology                                                                                    | Bundeswehr Institute of Microbiology                                                                                    | a, b    |
| Germany/BavPat3/2020              | EPI_ISL_414521 | 02.03.2020 | Bundeswehr Institute of Microbiology                                                                                    | Bundeswehr Institute of Microbiology                                                                                    | a, b    |

|                       |                |            |                                                                                           |                                                                                           |      |
|-----------------------|----------------|------------|-------------------------------------------------------------------------------------------|-------------------------------------------------------------------------------------------|------|
| Germany/NRW-01/2020   | EPI_ISL_413488 | 28.02.2020 | Center of Medical Microbiology, Virology, and Hospital Hygiene, University of Duesseldorf | Center of Medical Microbiology, Virology, and Hospital Hygiene, University of Duesseldorf | a, b |
| Germany/NRW-011/2020  | EPI_ISL_414507 | 03.03.2020 | Center of Medical Microbiology, Virology, and Hospital Hygiene, University of Duesseldorf | Center of Medical Microbiology, Virology, and Hospital Hygiene, University of Duesseldorf | a, b |
| Germany/NRW-02-1/2020 | EPI_ISL_414497 | 25.02.2020 | Center of Medical Microbiology, Virology, and Hospital Hygiene, University of Duesseldorf | Center of Medical Microbiology, Virology, and Hospital Hygiene, University of Duesseldorf | a, b |
| Germany/NRW-03/2020   | EPI_ISL_414498 | 26.02.2020 | Center of Medical Microbiology, Virology, and Hospital Hygiene, University of Duesseldorf | Center of Medical Microbiology, Virology, and Hospital Hygiene, University of Duesseldorf | a, b |
| Germany/NRW-04/2020   | EPI_ISL_414499 | 26.02.2020 | Center of Medical Microbiology, Virology, and Hospital Hygiene, University of Duesseldorf | Center of Medical Microbiology, Virology, and Hospital Hygiene, University of Duesseldorf | a, b |
| Germany/NRW-05/2020   | EPI_ISL_414504 | 26.02.2020 | Center of Medical Microbiology, Virology, and Hospital Hygiene, University of Duesseldorf | Center of Medical Microbiology, Virology, and Hospital Hygiene, University of Duesseldorf | a, b |
| Germany/NRW-06/2020   | EPI_ISL_414505 | 27.02.2020 | Center of Medical Microbiology, Virology, and Hospital Hygiene, University of Duesseldorf | Center of Medical Microbiology, Virology, and Hospital Hygiene, University of Duesseldorf | a, b |
| Germany/NRW-07/2020   | EPI_ISL_414506 | 27.02.2020 | Center of Medical Microbiology, Virology, and Hospital Hygiene, University of Duesseldorf | Center of Medical Microbiology, Virology, and Hospital Hygiene, University of Duesseldorf | a, b |
| Germany/NRW-08/2020   | EPI_ISL_414508 | 27.02.2020 | Center of Medical Microbiology, Virology, and Hospital Hygiene, University of Duesseldorf | Center of Medical Microbiology, Virology, and Hospital Hygiene, University of Duesseldorf | a, b |
| Germany/NRW-09/2020   | EPI_ISL_414509 | 28.02.2020 | Center of Medical Microbiology, Virology, and Hospital Hygiene, University of Duesseldorf | Center of Medical Microbiology, Virology, and Hospital Hygiene, University of Duesseldorf | a, b |
| Germany/NRW-10/2020   | EPI_ISL_414574 | 28.02.2020 | Center of Medical Microbiology, Virology, and Hospital Hygiene, University of Duesseldorf | Center of Medical Microbiology, Virology, and Hospital Hygiene, University of Duesseldorf | a, b |

|                             |                |            |                                                                                                                 |                                                                                                                 |         |
|-----------------------------|----------------|------------|-----------------------------------------------------------------------------------------------------------------|-----------------------------------------------------------------------------------------------------------------|---------|
| Iceland/18/2020             | EPI_ISL_417710 | 02.03.2020 | The National University Hospital of Iceland                                                                     | deCODE genetics                                                                                                 | c       |
| Iceland/46/2020             | EPI_ISL_417751 | 04.03.2020 | The National University Hospital of Iceland                                                                     | deCODE genetics                                                                                                 | b       |
| Iceland/54/2020             | EPI_ISL_417684 | 06.03.2020 | The National University Hospital of Iceland                                                                     | deCODE genetics                                                                                                 | a       |
| Ireland/Cork2/2020          | EPI_ISL_417432 | 08.03.2020 | UCD National Virus Reference Laboratory                                                                         | Public Health Wales Microbiology Cardiff                                                                        | a       |
| Ireland/Dublin-19072/2020   | EPI_ISL_414584 | 02.03.2020 | UCD National Virus Reference Laboratory                                                                         | UCD National Virus Reference Laboratory                                                                         | c       |
| Ireland/Limerick-19933/2020 | EPI_ISL_414585 | 03.03.2020 | UCD National Virus Reference Laboratory                                                                         | UCD National Virus Reference Laboratory                                                                         | b       |
| Italy/CDG1/2020             | EPI_ISL_412973 | 20.02.2020 | Department of Infectious Diseases, Istituto Superiore di Sanita, Roma , Italy                                   | Virology Laboratory, Scientific Department, Army Medical Center                                                 | a, c, b |
| Italy/FVG-ICGEB_S1/2020     | EPI_ISL_417418 | 01.03.2020 | Laboratory of Molecular Virology International Center for Genetic Engineering and Biotechnology (ICGEB)         | ARGO Open Lab Platform for Genome sequencing                                                                    | a, c, b |
| Italy/FVG-ICGEB_S5/2020     | EPI_ISL_417419 | 01.03.2020 | Laboratory of Molecular Virology International Center for Genetic Engineering and Biotechnology (ICGEB)         | ARGO Open Lab Platform for Genome sequencing                                                                    | a, c, b |
| Italy/FVG-ICGEB_S8/2020     | EPI_ISL_417421 | 01.03.2020 | Laboratory of Molecular Virology International Center for Genetic Engineering and Biotechnology (ICGEB)         | ARGO Open Lab Platform for Genome sequencing                                                                    | a, c, b |
| Italy/FVG-ICGEB_S9/2020     | EPI_ISL_417423 | 01.03.2020 | Laboratory of Molecular Virology International Center for Genetic Engineering and Biotechnology (ICGEB)         | ARGO Open Lab Platform for Genome sequencing                                                                    | a, c, b |
| Italy/INMI1-cs/2020         | EPI_ISL_410546 | 29.01.2020 | INMI Lazzaro Spallanzani IRCCS                                                                                  | Laboratory of Virology, INMI Lazzaro Spallanzani IRCCS                                                          | a, b    |
| Italy/INMI3/2020            | EPI_ISL_417921 | 01.03.2020 | INMI Lazzaro Spallanzani IRCCS                                                                                  | Laboratory of Virology, INMI Lazzaro Spallanzani IRCCS                                                          | a, c, b |
| Italy/INMI4/2020            | EPI_ISL_417922 | 28.02.2020 | INMI Lazzaro Spallanzani IRCCS                                                                                  | Laboratory of Virology, INMI Lazzaro Spallanzani IRCCS                                                          | a, c, b |
| Italy/INMI5/2020            | EPI_ISL_417923 | 04.03.2020 | INMI Lazzaro Spallanzani IRCCS                                                                                  | Laboratory of Virology, INMI Lazzaro Spallanzani IRCCS                                                          | a, c, b |
| Italy/UniMI01/2020          | EPI_ISL_417445 | 24.02.2020 | Laboratory of Infectious Diseases, Department of Biomedical and Clinical Sciences L. Sacco, University of Milan | Laboratory of Infectious Diseases, Department of Biomedical and Clinical Sciences L. Sacco, University of Milan | a, c, b |

|                                   |                |            |                                                                                                                 |                                                                                                                                    |         |
|-----------------------------------|----------------|------------|-----------------------------------------------------------------------------------------------------------------|------------------------------------------------------------------------------------------------------------------------------------|---------|
| Italy/UniMI03/2020                | EPI_ISL_417447 | 24.02.2020 | Laboratory of Infectious Diseases, Department of Biomedical and Clinical Sciences L. Sacco, University of Milan | Laboratory of Infectious Diseases, Department of Biomedical and Clinical Sciences L. Sacco, University of Milan                    | a, c, b |
| Italy/UniSR1/2020                 | EPI_ISL_413489 | 03.03.2020 | Laboratorio di Microbiologia e Virologia, Università Vita-Salute San Raffaele, Milano                           | Laboratorio di Microbiologia e Virologia, Università Vita-Salute San Raffaele, Milano                                              | a, c, b |
| Italy/UnivPM1/2020                | EPI_ISL_417491 | 03.03.2020 | Virology Laboratory, Department of Biomedical Sciences and Public Health, University Politecnica delle Marche   | Virology and Legal Medicine Laboratories, Department of Biomedical Sciences and Public Health, University Politecnica delle Marche | a, c, b |
| Luxembourg/Lux1/2020              | EPI_ISL_413593 | 29.02.2020 | Laboratoire National de Sante                                                                                   | Erasmus Medical Center                                                                                                             | a, c, b |
| Mexico/CDMX-IndRE_01/2020         | EPI_ISL_412972 | 27.02.2020 | Instituto Nacional de Enfermedades Respiratorias                                                                | Instituto de Diagnostico y Referencia Epidemiologicos (INDRE)                                                                      | c       |
| Netherlands/Andel_1365066/2020    | EPI_ISL_413564 | 01.03.2020 | MHC West-Brabant                                                                                                | Erasmus Medical Center                                                                                                             | b       |
| Netherlands/Berlicum_1363564/2020 | EPI_ISL_413565 | 24.02.2020 | Foundation Pamm                                                                                                 | Erasmus Medical Center                                                                                                             | b       |
| Netherlands/Blaricum_1364780/2020 | EPI_ISL_413566 | 02.03.2020 | MHC Gooi & Vechtstreek                                                                                          | Erasmus Medical Center                                                                                                             | c       |
| Netherlands/Limburg_4/2020        | EPI_ISL_414426 | 03.03.2020 | Dutch COVID-19 response team                                                                                    | Erasmus Medical Center                                                                                                             | b       |
| Netherlands/NoordBrabant_15/2020  | EPI_ISL_414455 | 06.03.2020 | Dutch COVID-19 response team                                                                                    | Erasmus Medical Center                                                                                                             | b       |
| Netherlands/NoordBrabant_2/2020   | EPI_ISL_414449 | 03.03.2020 | Dutch COVID-19 response team                                                                                    | Erasmus Medical Center                                                                                                             | c       |
| Netherlands/NoordBrabant_3/2020   | EPI_ISL_414429 | 02.03.2020 | Dutch COVID-19 response team                                                                                    | Erasmus Medical Center                                                                                                             | b       |
| Netherlands/NoordBrabant_4/2020   | EPI_ISL_414450 | 06.03.2020 | Dutch COVID-19 response team                                                                                    | Erasmus Medical Center                                                                                                             | b       |
| Netherlands/Utrecht_6/2020        | EPI_ISL_414461 | 04.03.2020 | Dutch COVID-19 response team                                                                                    | Erasmus Medical Center                                                                                                             | a       |
| Netherlands/Zeevolde_1365080/2020 | EPI_ISL_413591 | 02.03.2020 | MHC Flevoland                                                                                                   | Erasmus Medical Center                                                                                                             | c, b    |
| Netherlands/ZuidHolland_10/2020   | EPI_ISL_414446 | 03.03.2020 | Dutch COVID-19 response team                                                                                    | Erasmus Medical Center                                                                                                             | a       |
| Netherlands/ZuidHolland_13/2020   | EPI_ISL_414470 | 06.03.2020 | Dutch COVID-19 response team                                                                                    | Erasmus Medical Center                                                                                                             | a       |
| Netherlands/ZuidHolland_22/2020   | EPI_ISL_414564 | 08.03.2020 | Dutch COVID-19 response team                                                                                    | Erasmus Medical Center                                                                                                             | a       |

|                                 |                |            |                                                                                                                                                                                                                     |                                                                                                                                                               |      |
|---------------------------------|----------------|------------|---------------------------------------------------------------------------------------------------------------------------------------------------------------------------------------------------------------------|---------------------------------------------------------------------------------------------------------------------------------------------------------------|------|
| Netherlands/Zuid Holland_6/2020 | EPI_ISL_414466 | 04.03.2020 | Dutch COVID-19 response team                                                                                                                                                                                        | Erasmus Medical Center                                                                                                                                        | c    |
| NewZealand/20VR0189/2020        | EPI_ISL_416519 | 02.03.2020 | Auckland Hospital                                                                                                                                                                                                   | Institute of Environmental Science and Research (ESR)                                                                                                         | c    |
| NewZealand/20VR019/2020         | EPI_ISL_416520 | 04.03.2020 | Auckland Hospital                                                                                                                                                                                                   | Institute of Environmental Science and Research (ESR)                                                                                                         | c    |
| Nigeria/Lagos01/2020            | EPI_ISL_413550 | 27.02.2020 | Centre for Human and Zoonotic Virology (CHAZVY), College of Medicine University of Lagos/Lagos University Teaching Hospital (LUTH), part of the Laboratory Network of the Nigeria Centre for Disease Control (NCDC) | African Centre of Excellence for Genomics of Infectious Diseases (ACEGID), Redeemer's University, Ede, Osun State, Nigeria                                    | c    |
| Norway/1493/2020                | EPI_ISL_417488 | 29.02.2020 | Oslo University Hospital, Department of Medical Microbiology                                                                                                                                                        | Norwegian Institute of Public Health, Department of Virology                                                                                                  | b    |
| Norway/1494/2020                | EPI_ISL_417489 | 29.02.2020 | Oslo University Hospital, Department of Medical Microbiology                                                                                                                                                        | Norwegian Institute of Public Health, Department of Virology                                                                                                  | a    |
| Norway/1526/2020                | EPI_ISL_417485 | 02.03.2020 | University Hospital of Northern Norway, Department for Microbiology and Infectious Disease Control                                                                                                                  | Norwegian Institute of Public Health, Department of Virology                                                                                                  | c    |
| Panama/328677/2020              | EPI_ISL_415152 | 06.03.2020 | Gorgas Memorial Institute for Health Studies                                                                                                                                                                        | Gorgas Memorial Institute for Health Studies                                                                                                                  | c    |
| Poland/PL_P1/2020               | EPI_ISL_416488 | 03.03.2020 | ViroGenetics - BSL3 Laboratory of Virology; Human Genome Variation Research Group & Genomics Centre MCB; Bioinformatics Research Group Department of Virology                                                       | ViroGenetics - BSL3 Laboratory of Virology; Human Genome Variation Research Group & Genomics Centre MCB; Bioinformatics Research Group Department of Virology | a, b |
| Portugal/PT0001b/2020           | EPI_ISL_417986 | 03.03.2020 | Centro Hospitalar e Universitario de Sao Joao, Porto                                                                                                                                                                | Instituto Nacional de Saude (INSA)                                                                                                                            | b    |
| Portugal/PT0003/2020            | EPI_ISL_417987 | 03.03.2020 | Centro Hospitalar e Universitario de Sao Joao, Porto                                                                                                                                                                | Instituto Nacional de Saude (INSA)                                                                                                                            | b    |
| Portugal/PT0026/2020            | EPI_ISL_418011 | 04.03.2020 | CHULC - H Curry Cabral                                                                                                                                                                                              | Instituto Nacional de Saude (INSA)                                                                                                                            | a, c |
| Scotland/CVR05/2020             | EPI_ISL_414027 | 04.03.2020 | West of Scotland Specialist Virology Centre, NHSGGC                                                                                                                                                                 | MRC-University of Glasgow Centre for Virus Research                                                                                                           | b    |

|                                   |                |            |                                                                                                                                                             |                                                                                                                                               |         |
|-----------------------------------|----------------|------------|-------------------------------------------------------------------------------------------------------------------------------------------------------------|-----------------------------------------------------------------------------------------------------------------------------------------------|---------|
| Senegal/003/2020                  | EPI_ISL_418206 | 28.02.2020 | Institut Pasteur Dakar                                                                                                                                      | Institut Pasteur de Dakar                                                                                                                     | c       |
| Senegal/016/2020                  | EPI_ISL_418207 | 02.03.2020 | Institut Pasteur Dakar                                                                                                                                      | Institut Pasteur de Dakar                                                                                                                     | c       |
| Senegal/020/2020                  | EPI_ISL_418208 | 04.03.2020 | Institut Pasteur Dakar                                                                                                                                      | Institut Pasteur de Dakar                                                                                                                     | c       |
| Senegal/026/2020                  | EPI_ISL_418209 | 03.03.2020 | Institut Pasteur Dakar                                                                                                                                      | Institut Pasteur de Dakar                                                                                                                     | c       |
| Slovakia/SK-BMC5/2020             | EPI_ISL_417879 | 06.03.2020 | Institute of Virology, Biomedical Research Center of the Slovak Academy of Sciences, Bratislava; Public Health Authority of the Slovak Republic, Bratislava | Institute of Virology, Biomedical Research Center of the Slovak Academy of Sciences, Bratislava; Comenius University Science Park, Bratislava | c, b    |
| Slovakia/SK-BMC6/2020             | EPI_ISL_417880 | 08.03.2020 | Institute of Virology, Biomedical Research Center of the Slovak Academy of Sciences, Bratislava; Public Health Authority of the Slovak Republic, Bratislava | Institute of Virology, Biomedical Research Center of the Slovak Academy of Sciences, Bratislava; Comenius University Science Park, Bratislava | a       |
| SouthAfrica/R03006/2020           | EPI_ISL_417186 | 07.03.2020 | National Institute for Communicable Diseases of the National Health Laboratory Service                                                                      | National Institute for Communicable Diseases of the National Health Laboratory Service                                                        | c       |
| Spain/Andalucia201272/2020        | EPI_ISL_418243 | 28.02.2020 | HOSPITAL UNIVERSITARIO VIRGEN DE LAS NIEVES                                                                                                                 | Instituto de Salud Carlos III                                                                                                                 | a, b    |
| Spain/Andalucia201373/2020        | EPI_ISL_418244 | 02.03.2020 | HOSPITAL UNIVERSITARIO VIRGEN DE LAS NIEVES                                                                                                                 | Instituto de Salud Carlos III                                                                                                                 | b       |
| Spain/CastillaLaMancha201328/2020 | EPI_ISL_418245 | 01.03.2020 | Hospital General y Universitario de Guadalajara                                                                                                             | Instituto de Salud Carlos III                                                                                                                 | a, b    |
| Spain/CastillaLaMancha201329/2020 | EPI_ISL_418246 | 01.03.2020 | Hospital General y Universitario de Guadalajara                                                                                                             | Instituto de Salud Carlos III                                                                                                                 | a, b    |
| Spain/CastillaLeon201061/2020     | EPI_ISL_418247 | 26.02.2020 | HOSPITAL GENERAL DE SEGOVIA                                                                                                                                 | Instituto de Salud Carlos III                                                                                                                 | a, c, b |
| Spain/CastillaLeon201323/2020     | EPI_ISL_418248 | 01.03.2020 | COMPLEJO ASISTENCIAL UNIVERSITARIO DE BURGOS                                                                                                                | Instituto de Salud Carlos III                                                                                                                 | a, b    |
| Spain/CastillaLeon201372/2020     | EPI_ISL_418249 | 03.03.2020 | COMPLEJO ASISTENCIAL UNIVERSITARIO DE BURGOS                                                                                                                | Instituto de Salud Carlos III                                                                                                                 | a, b    |
| Spain/CastillaLeon201437/2020     | EPI_ISL_416994 | 04.03.2020 | COMPLEJO ASISTENCIAL                                                                                                                                        | Instituto de Salud Carlos III                                                                                                                 | b       |

|                            |                |            |                                                                                 |                                                                                                         |         |
|----------------------------|----------------|------------|---------------------------------------------------------------------------------|---------------------------------------------------------------------------------------------------------|---------|
|                            |                |            | UNIVERSITARIO DE BURGOS                                                         |                                                                                                         |         |
| Spain/Galicia201663/2020   | EPI_ISL_417007 | 07.03.2020 | HOSPITAL SANTA MARIA NAI                                                        | Instituto de Salud Carlos III                                                                           | a, c, b |
| Spain/Madrid201105/2020    | EPI_ISL_418251 | 25.02.2020 | HOSPITAL UNIVERSITARIO LA PAZ                                                   | Instituto de Salud Carlos III                                                                           | a, c, b |
| Spain/Madrid201442/2020    | EPI_ISL_417010 | 04.03.2020 | FUNDACION JIMENEZ DIAZ                                                          | Instituto de Salud Carlos III                                                                           | c, b    |
| Spain/Madrid201449/2020    | EPI_ISL_418252 | 04.03.2020 | FUNDACION JIMENEZ DIAZ                                                          | Instituto de Salud Carlos III                                                                           | a, b    |
| Spain/Madrid_R10_33/2020   | EPI_ISL_417981 | 02.03.2020 | Hospital Universitario Ramon y Cajal                                            | Hospital Universitario La Paz                                                                           | a, b    |
| Spain/Madrid_R2_15/2020    | EPI_ISL_417979 | 03.03.2020 | Hospital Universitario Ramon y Cajal                                            | Hospital Universitario La Paz                                                                           | a, b    |
| Spain/Madrid_R5_8/2020     | EPI_ISL_417980 | 03.03.2020 | Hospital Universitario Ramon y Cajal                                            | Hospital Universitario La Paz                                                                           | b       |
| Spain/PaisVasco201382/2020 | EPI_ISL_418253 | 02.03.2020 | HOSPITAL TXAGORRITXU                                                            | Instituto de Salud Carlos III                                                                           | b       |
| Spain/Valencia1/2020       | EPI_ISL_414495 | 08.03.2020 | Servicio Microbiologia. Hospital Clinico Universitario. Valencia.               | Sequencing and Bioinformatics Service. Molecular Epidemiology Laboratory. FISABIO-Public Health         | a, c, b |
| Spain/Valencia10/2020      | EPI_ISL_417206 | 06.03.2020 | Servicio de Microbiologia. Consorcio Hospital General Universitario de Valencia | Sequencing and Bioinformatics Service and Molecular Epidemiology Research Group. FISABIO-Public Health  | a, b    |
| Spain/Valencia2/2020       | EPI_ISL_414496 | 04.03.2020 | Servicio Microbiologia. Hospital Clinico Universitario. Valencia.               | Sequencing and Bioinformatics Service. Molecular Epidemiology Laboratory. FISABIO-Public Health         | a, b    |
| Spain/Valencia3/2020       | EPI_ISL_414598 | 05.03.2020 | Servicio Microbiologia, Hospital Clinico Universitario, Valencia                | Sequencing and Bioinformatics Service and Molecular Epidemiology Research Group. FISABIO-Public Health. | a, b    |
| Spain/Valencia4/2020       | EPI_ISL_416483 | 26.02.2020 | Servicio de Microbiologia. Consorcio Hospital General Universitario de Valencia | Sequencing and Bioinformatics Service and Molecular Epidemiology Research Group. FISABIO-Public Health  | a, b    |
| Spain/Valencia5/2020       | EPI_ISL_416484 | 27.02.2020 | Servicio de Microbiologia. Consorcio Hospital General Universitario de Valencia | Sequencing and Bioinformatics Service and Molecular Epidemiology Research Group. FISABIO-Public Health  | b       |
| Spain/Valencia6/2020       | EPI_ISL_416485 | 27.02.2020 | Servicio de Microbiologia. Consorcio Hospital General Universitario de Valencia | Sequencing and Bioinformatics Service and Molecular Epidemiology Research Group. FISABIO-Public Health  | a, b    |

|                           |                |            |                                                                                 |                                                                                                        |      |
|---------------------------|----------------|------------|---------------------------------------------------------------------------------|--------------------------------------------------------------------------------------------------------|------|
| Spain/Valencia7/2020      | EPI_ISL_416486 | 02.03.2020 | Servicio de Microbiología. Consorcio Hospital General Universitario de Valencia | Sequencing and Bioinformatics Service and Molecular Epidemiology Research Group. FISABIO-Public Health | c, b |
| Spain/Valencia8/2020      | EPI_ISL_416487 | 04.03.2020 | Servicio de Microbiología. Consorcio Hospital General Universitario de Valencia | Sequencing and Bioinformatics Service and Molecular Epidemiology Research Group. FISABIO-Public Health | b    |
| Spain/Valencia9/2020      | EPI_ISL_417205 | 02.03.2020 | Servicio de Microbiología. Consorcio Hospital General Universitario de Valencia | Sequencing and Bioinformatics Service and Molecular Epidemiology Research Group. FISABIO-Public Health | a, b |
| Sweden/01/2020            | EPI_ISL_411951 | 07.02.2020 | unknown                                                                         | Unit for Laboratory Development and Technology Transfer, Public Health Agency of Sweden                | a, b |
| Switzerland/42169471/2020 | EPI_ISL_418273 | 28.02.2020 | University Hospital Basel, Clinical Virology                                    | University Hospital Basel, Labormedizin                                                                | b    |
| Switzerland/42177434/2020 | EPI_ISL_418435 | 05.03.2020 | University Hospital Basel, Clinical Virology                                    | University Hospital Basel, Clinical Bacteriology                                                       | c    |
| Switzerland/42178712/2020 | EPI_ISL_418437 | 06.03.2020 | University Hospital Basel, Clinical Virology                                    | University Hospital Basel, Clinical Bacteriology                                                       | b    |
| Switzerland/BE2536/2020   | EPI_ISL_415704 | 04.03.2020 | Hopitaux universitaires de Geneve Laboratoire de Virologie                      | Hopitaux universitaires de Geneve Laboratoire de Virologie                                             | a    |
| Switzerland/BL0902/2020   | EPI_ISL_414021 | 27.02.2020 | Laboratoire de Virologie, HUG                                                   | Swiss National Reference Centre for Influenza                                                          | a    |
| Switzerland/GE3121/2020   | EPI_ISL_414019 | 27.02.2020 | Laboratoire de Virologie, HUG                                                   | Swiss National Reference Centre for Influenza                                                          | c    |
| Switzerland/GE8102/2020   | EPI_ISL_415458 | 01.03.2020 | Hopitaux universitaires de Geneve Laboratoire de Virologie                      | Hopitaux universitaires de Geneve Laboratoire de Virologie                                             | c    |
| Switzerland/GE9586/2020   | EPI_ISL_414022 | 27.02.2020 | Laboratoire de Virologie, HUG                                                   | Swiss National Reference Centre for Influenza                                                          | b    |
| Switzerland/GR2988/2020   | EPI_ISL_415698 | 27.02.2020 | Hopitaux universitaires de Geneve Laboratoire de Virologie                      | Hopitaux universitaires de Geneve Laboratoire de Virologie                                             | a, b |
| Taiwan/NTU03/2020         | EPI_ISL_413592 | 02.03.2020 | Department of Laboratory Medicine, National Taiwan University Hospital          | Microbial Genomics Core Lab, National Taiwan University Centers of Genomic and Precision Medicine      | c    |
| USA/CA-CDPH-UC24/2020     | EPI_ISL_417328 | 07.03.2020 | California Department of Public Health                                          | Chiu Laboratory, University of California, San Francisco                                               | c    |
| USA/WA-UW25/2020          | EPI_ISL_414594 | 05.03.2020 | UW Virology Lab                                                                 | UW Virology Lab                                                                                        | c    |
| USA/WA-UW29/2020          | EPI_ISL_414616 | 08.03.2020 | UW Virology Lab                                                                 | UW Virology Lab                                                                                        | c    |
| Vietnam/39607/2020        | EPI_ISL_416428 | 07.03.2020 | National Influenza Center, National Institute of Hygiene                        | National Influenza Center, National Institute of Hygiene and Epidemiology (NIHE)                       | c    |



|                        |                |            |                                                                                         |                                                                                                                                                                                                                            |      |
|------------------------|----------------|------------|-----------------------------------------------------------------------------------------|----------------------------------------------------------------------------------------------------------------------------------------------------------------------------------------------------------------------------|------|
|                        |                |            | and Epidemiology (NIHE)                                                                 |                                                                                                                                                                                                                            |      |
| Vietnam/CM295/2020     | EPI_ISL_416430 | 06.03.2020 | National Influenza Center, National Institute of Hygiene and Epidemiology (NIHE)        | National Influenza Center, National Institute of Hygiene and Epidemiology (NIHE)                                                                                                                                           | c    |
| Vietnam/CM296/2020     | EPI_ISL_416431 | 06.03.2020 | National Influenza Center, National Institute of Hygiene and Epidemiology (NIHE)        | National Influenza Center, National Institute of Hygiene and Epidemiology (NIHE)                                                                                                                                           | c    |
| Wuhan-Hu-1/2019        | EPI_ISL_402125 | 26.12.2019 | unknown                                                                                 | National Institute for Communicable Disease Control and Prevention (ICDC) Chinese Center for Disease Control and Prevention (China CDC)                                                                                    | a, b |
| Wuhan/HBCDC-HB-04/2020 | EPI_ISL_412980 | 18.01.2020 | Union Hospital of Tongji Medical College, Huazhong University of Science and Technology | Hubei Provincial Center for Disease Control and Prevention                                                                                                                                                                 | a, b |
| Wuhan/HBCDC-HB-05/2020 | EPI_ISL_412981 | 18.01.2020 | CR&WISCO GENERAL HOSPITAL                                                               | Hubei Provincial Center for Disease Control and Prevention                                                                                                                                                                 | a, b |
| Wuhan/IVDC-HB-05/2019  | EPI_ISL_402121 | 30.12.2019 | National Institute for Viral Disease Control and Prevention, China CDC                  | National Institute for Viral Disease Control and Prevention, China CDC                                                                                                                                                     | a, b |
| Wuhan/WH01/2019        | EPI_ISL_406798 | 26.12.2019 | General Hospital of Central Theater Command of People's Liberation Army of China        | BGI & Institute of Microbiology, Chinese Academy of Sciences & Shandong First Medical University & Shandong Academy of Medical Sciences & General Hospital of Central Theater Command of People's Liberation Army of China | a, b |
| Wuhan/WH03/2020        | EPI_ISL_406800 | 01.01.2020 | General Hospital of Central Theater Command of People's Liberation Army of China        | BGI & Institute of Microbiology, Chinese Academy of Sciences & Shandong First Medical University & Shandong Academy of Medical Sciences & General Hospital of Central Theater Command of People's Liberation Army of China | a, b |
| Wuhan/WHU01/2020       | EPI_ISL_406716 | 02.01.2020 | unknown                                                                                 | State Key Laboratory of Virology, Wuhan University                                                                                                                                                                         | a, b |
| Wuhan/WHU02/2020       | EPI_ISL_406717 | 02.01.2020 | unknown                                                                                 | State Key Laboratory of Virology, Wuhan University                                                                                                                                                                         | a, b |

|                      |                    |            |                             |                                                                |      |
|----------------------|--------------------|------------|-----------------------------|----------------------------------------------------------------|------|
| Wuhan/WIV07/2<br>019 | EPI_ISL<br>_402130 | 30.12.2019 | Wuhan Jinyintan<br>Hospital | Wuhan Institute of Virology,<br>Chinese Academy of<br>Sciences | a, b |
|----------------------|--------------------|------------|-----------------------------|----------------------------------------------------------------|------|

## References
